# Supplementary material
Source: publisher figshare collection journal article supplement (https://acs.figshare.com/ndownloader/files/14794484)
Supplement: Supplementary file 1 [file 14794484]

## Sheet: Legend
Supporting Table S3 - Profiling of 13 PIKK and PI3K inhibitors
S3A Inhibitors
	Column	Description
	Drug	Name of the drug
	Synonyms	Synonyms of the drug
	Designated targets	Designated targets according to supplier
	Other targets	Other targets according to supplier
	Clinical phase	Clinical phase as of 8/2018
	Supplier	Supplier of drug used in this study
	Supplier order #	Order number at supplier
	ChEMBL ID	ChEMBL identifier
	PubChemCID	PubChem identifier
	CAS number	CAS identifier
	SMILES code	SMILES code of drug
S3B Direct binder list
	Column	Description
	Protein	Gene name or Uniprot Accession of the target
	protein/lipid kinase	An "x" indicates that this protein is a protein or lipid kinase
	pseudokinase	An "x" indicates that this protein is a pseudo kinase
	NTP binding	An "x" indicates that this protein is a nucleotide binding protein
	metabolic kinase	An "x" indicates that this protein is a metabolic kinase
	Helicase	An "x" indicates that this protein is a helicase
	GTPase	An "x" indicates that this protein is a GTPase
	ATPase	An "x" indicates that this protein is a ATPase
	FAD cofactor	An "x" indicates that this protein requires FAD as a co-factor
	heme binding	An "x" indicates that this protein is a heme binder
	might be coenriched	An "x" indicates that this protein might be coenriched as a complex member
	direct binder list	An "x" indicates that this protein might be a direct binder to the Kinobeads
	interacting kinases (BioGrid)	potential complex partner
	Overall confidence	Shows the highest confidence of an observed drug:protein interaction in all data for Klaeger et al.
S3C Drug Matrix of direct binders
	Column	Description
	Gene Name	Gene name or Uniprot Accession of the target
	Apitolisib	This and all subsequent columns contain the apparent pKds [M] of the respective inhibitor towards all direct binders. Values of 3 incates no binding to the inhibitor.
S3D Drug Targets
	Column	Description
	Gene Name	Gene name or Uniprot Accession of the target
	Relative Intensity DMSO	Relative intensity used for the curve fit (normalized to DMSO)
	Relative Intensity 1 nM	Relative intensity used for the curve fit (normalized to DMSO)
	Relative intensity 3 nM	Relative intensity used for the curve fit (normalized to DMSO)
	Relative Intensity 10 nM	Relative intensity used for the curve fit (normalized to DMSO)
	Relative Intensity 30 nM	Relative intensity used for the curve fit (normalized to DMSO)
	Relative Intensity 100 nM	Relative intensity used for the curve fit (normalized to DMSO)
	Relative Intensity 300 nM	Relative intensity used for the curve fit (normalized to DMSO)
	Relative Intensity 1000 nM	Relative intensity used for the curve fit (normalized to DMSO)
	Relative Intensity 3000 nM	Relative intensity used for the curve fit (normalized to DMSO)
	Relative Intensity 10000 nM	Relative intensity used for the curve fit (normalized to DMSO)
	Intensity	Summed intensity of the protein in the experiment
	Intensity Type	Describes the intensity value used for the curve fit. Can be either Normalized LFQ intensity (Maxquant LFQ) or Normalized intensity (raw intensity)
	Slope	Hill slope of the curve fit at the inflection point. See also Supplementary Information for details about the curve fit
	Bottom	Plateau of the curve fit. See also Supplementary Information for details about the curve fit
	Top	Maximal residual binding of the curve fit. See also Supplementary Information for details about the curve fit
	Inflection	Inflection point of the curve fit. This value is the EC50. See also Supplementary Information for details about the curve fit
	EC50	EC50 (inflection point)
	Correction Factor	Correction factor used to transform EC50 values into apparent Kd
	Apparent Kd	Calculated based on EC50 * min(1, Correction factor)
S3E CATDS target
	Column	Description
	Drug	Inhibitor name (see also S3A)
	Target	Gene name or Uniprot Accession of the target.
	At	Apparent Kd of the drug-protein interaction at which the CATDS was calculated.
	CATDS	Concentration and target dependent selectivity.
S3F CATDS ACVR1
	Column	Description
	Drug	Inhibitor name of clinical kinase inhibitors (see Klaeger et al.)
	Target	Gene name or Uniprot Accession of the target.
	Kdapp (ACVR1)	Apparent Kd of the drug-protein interaction at which the CATDSACVR1 was calculated.
	CATDSACVR1	Concentration and target dependent selectivity ALK2 inhibitors.
S3G Comparison of binding affinity between Kinobeads data and recombinant kinase assays
	Column	Description
	Compound	Inhibitor name (see also S3A)
	Target	Gene name or Uniprot Accession of the target.
	KBε Kdapp	apparent Kd of the drug-protein interaction obtained with KBε
	Literature affinities	IC50 or Ki values obtained with recombinant kinase assays
	Literature reference	see References of Supporting information

## Sheet: S3A_Inhibitors
Drug	Synonyms	Designated targets	Other targets	Clinical phase	Supplier	Supplier order #	ChEMBL ID	PubChemCID	CAS number	SMILES code
CP466722	CP-466722	ATM	ABL,SRC	research	Selleckchem	S2245	CHEMBL2143829	44551660	1080622-86-1	COC1=C(C=C2C(=C1)C(=NC=N2)N3C(=NC(=N3)C4=CC=CC=N4)N)OC
KU60019		ATM	ATR,PRKDC	research	Selleckchem	S1570		15953870	925701-49-1	C[C@@H]1CN(C[C@@H](O1)C)CC(=O)NC2=CC3=C(C=C2)SC4=C(C=CC=C4C3)C5=CC(=O)C=C(O5)N6CCOCC6
AZD6738		ATR		Phase II	Selleckchem	S7693	CHEMBL3545178	54761306	1352226-88-0	C[C@@H]1COCCN1C2=NC(=NC(=C2)C3(CC3)[S@](=N)(=O)C)C4=C5C=CNC5=NC=C4
VE-822	VX970, Berzosertib	ATR		Phase II	Selleckchem	S7102	CHEMBL3989870	59472121	1232416-25-9	CC(C)S(=O)(=O)C1=CC=C(C=C1)C2=CN=C(C(=N2)C3=CC(=NO3)C4=CC=C(C=C4)CNC)N
VS5584	SB2343, VS-5584	MTOR,PIK3CA,PIK3CB,PIK3CD,PIK3CG		Phase I	Selleckchem	S7016		46912230	1246560-33-7	CC1=NC2=C(N=C(N=C2N1C(C)C)N3CCOCC3)C4=CN=C(N=C4)N
CH5132799	PA-799	PIK3CA	PIK3CB,PIK3CG,PIK3CD	Phase I	Selleckchem	S2699	CHEMBL1684984	49784945	1007207-67-1	CS(=O)(=O)N1CCC2=C(N=C(N=C21)N3CCOCC3)C4=CN=C(N=C4)N
Omipalisib	GSK2126458	PIK3CA,PIK3CB,PIK3CD,PIK3CG	MTOR	Phase I	Selleckchem	S2658	CHEMBL1236962	25167777	1086062-66-9	COc1ncc(cc1NS(=O)(=O)c2ccc(F)cc2F)c3ccc4nccc(c5ccnnc5)c4c3
Apitolisib	RG-7422, G-038390, GDC-0980.1, G-038390.1, GDC-0980, GNE390	PIK3CA,PIK3CB,PIK3CD,PIK3CG	MTOR	Phase II	Selleckchem	S2696	CHEMBL1922094	25254071	1032754-93-0	C[C@H](O)C(=O)N1CCN(Cc2sc3c(nc(nc3c2C)c4cnc(N)nc4)N5CCOCC5)CC1
NVP-BEZ235	Dactolosib, BEZ-235, NVP-BEZ235-NX, NVP-BEZ235-ANA, Dactolisib Tosylate	PIK3CA,PIK3CB,PIK3CD,PIK3CG,MTOR	ATR	Phase II	Selleckchem	S1009	CHEMBL1879463	11977753	915019-65-7	CN1C(=O)N(c2ccc(cc2)C(C)(C)C#N)c3c1cnc4ccc(cc34)c5cnc6ccccc6c5
PF-04691502	PF4691502	PIK3CA,PIK3CB,PIK3CD,PIK3CG,MTOR	PIK3C3,AKT,PDK1,RPS6KB1,RPS6KB2,MAP2K1,MAP2K2,MAPK3,MAPK1,MAPK14,MAPK11,MAPK12,MAPK13,MAPK8,MAPK9,MAPK10	Phase II	Selleckchem	S2743	CHEMBL1234354	25033539	1013101-36-4	COc1ccc(cn1)C2=Cc3c(C)nc(N)nc3N([C@@H]4CC[C@H](CC4)OCCO)C2=O
BGT226	NVP-BGT226	PIK3CA,PIK3CB,PIK3CG,MTOR		Phase I/II	Selleckchem	S2749	CHEMBL3218578	11978790	915020-55-2	COc1ccc(cn1)c2ccc3ncc4N(C)C(=O)N(c5ccc(N6CCNCC6)c(c5)C(F)(F)F)c4c3c2
Gedatolisib	PKI-587, PF-05212384	PIK3CA,PIK3CG,MTOR	PIK3CA	Phase I/II	Selleckchem	S2628	CHEMBL592445	44516953	1197160-78-3	CN(C)C1CCN(CC1)C(=O)c2ccc(NC(=O)Nc3ccc(cc3)c4nc(nc(n4)N5CCOCC5)N6CCOCC6)cc2
Voxtalisib	XL-765, SAR-245409	PIK3CG	PIK3CA,PIK3CB,PIK3CD,MTOR,PRKDC	Phase II	Selleckchem	S7646	CHEMBL3545366	49867926	934493-76-2	CCN1C(=O)C(=Cc2c(C)nc(N)nc12)c3cc[nH]n3

## Sheet: S3B_DirectBinderList
Protein	protein/lipid kinase	pseudokinase	NTP binding	metabolic kinase	Helicase	GTPase	ATPase	FAD cofactor	heme binding	might be coenriched	direct binder list	interacting kinases (BioGrid)	Overall confidence
AAK1	x		x								x		High confidence
AARS			x								x		High confidence
ABL1	x		x								x		High confidence
ABL2	x		x								x		High confidence
ACAD10								x		x	x	NTRK3	High confidence
ACAD11								x		x	x	STK25	High confidence
ACADVL								x		x	x	NTRK1|EEF2K	Low confidence
ACOX1								x		x	x	RAF1	Low confidence
ACOX3								x			x		High confidence
ACP1										x		EPHA2|EPHB1|EGFR|ZAP7|EPHB2|CDK2	Low confidence
ACSL3										x		LYN|CHEK1|YES1|MAPK4|NTRK1	Low confidence
ACSL5			x								x		Low confidence
ACTR2			x								x		Low confidence
ACTR3			x							x	x	LRRK2|NTRK1|TP53RK|PRKACB	High confidence
ACVR1	x		x								x		High confidence
ACVR1B	x		x								x		High confidence
ACVR2B	x		x								x		High confidence
ACVRL1	x		x								x		High confidence
ADCK1	x		x								x		High confidence
ADCK3	x	x	?								x		High confidence
ADCK5	x		x								x		Low confidence
ADD2										x		FYN|ROCK|	Low confidence
ADK			x	x							x		High confidence
ADRBK1	x		x								x		High confidence
ADSL			x								x		Low confidence
AFF1										x		CDK9|PIP4K2A|CAMKV	High confidence
AFF4										x		CDK9|CAMKV|PIP4K2A|CDK15|GRK5	High confidence
AK2			x	x							x		High confidence
AKAP9										x			High confidence
AKT1	x		x								x		High confidence
AKT2	x		x								x		High confidence
AKT3	x		x								x		High confidence
ALK	x		x								x		Low confidence
AP1B1										x		EGFR|NTRK1|PRKDC|ATR|NTRK2|CDK2|ATM	Low confidence
AP1G1			x								x		High confidence
AP2A1										x		AAK1|EGFR|GAK|NTRK1|ABL1|CRK|GRK5|CSNK1E|EPHA2	High confidence
AP2A2										x		EGFR|NTRK1|GAK|GRK5|PIP5K1C	High confidence
AP2B1										x		EGFR|TGFBR2|BUB1B|NTRK1|AAK1|GAK|EPHA2|ABL1|ERBB2|TGFBR1|PIP5K1C	High confidence
AP2M1										x		EGFR|AAK1|(BCR)|BMP2K|GAK|MARK2|PRKACB|ABL1|CSNK1E|CDK11B|STK11|EPHA2|PRKDC	High confidence
APRT			x								x		Low confidence
ARAF	x		x								x		High confidence
ATM	x		x								x		High confidence
ATR	x		x								x		Low confidence
AURKA	x		x								x		High confidence
AURKB	x		x								x		High confidence
AXL	x		x								x		High confidence
AZI2										x		TBK1|IKBKE	High confidence
BCR			x							x	x	ABL1	High confidence
BMP2K	x		x								x		High confidence
BMPR1A	x		x								x		High confidence
BMPR1B	x		x								x		High confidence
BMPR2	x		x								x		High confidence
BRAF	x		x								x		High confidence
BRD4										x		CDK9|PIP4K2A|CSMKV	Low confidence
BRD4;BRD3										x		CDK9|PIP4K2A|CSMKV	Low confidence
BTK	x		x								x		High confidence
BUB1	x		x								x		High confidence
C2CD5										x		CDK5|CDK2|NTRK1|LCK	High confidence
CAB39										x		STK11|STRADB|STRADA|STK25|PIP4K2A	High confidence
CABLES1										x		CDK5	High confidence
CABLES2										x		CDK5|CDK3|ABL1	High confidence
CALR										x		NTRK1|PRKACA|MAPK6|GRK5|CDK2|EEF2K	Low confidence
CAMK1G	x		x								x		High confidence
CAMK2B	x		x								x		High confidence
CAMK2D	x		x								x		High confidence
CAMK2G	x		x								x		High confidence
CAMK4	x		x								x		High confidence
CAMKK2	x		x								x		High confidence
CAPNS1										x		PAK2|CDK4|STK24	Low confidence
CAPZA1										x		MARK2|NTRK1|LRRK2|MARK3|RPS6KB2	Low confidence
CARS			x							x	x	NTRK1	High confidence
CCAR2										x		CDK9|NTRK1|CHEK2|CDK7|NEK6	High confidence
CCDC47										x		IRAK1|NTRK1|ILK	Low confidence
CCNA2										x		CDK2|CDK1|CDK7|CDK4|CDK5|CDK3|PKMYT1|CDK1|CDK6|TP53|DYRK1A|DYRK1B	High confidence
CCNB1										x		CDK1|CDK2|CDK5|CDK7|PRKDC|PKMYT1|TGFBR2|CDK3	High confidence
CCNB2										x		CDK1|CDK2|CDK7|PKMYT1|ATR|TGFBR2|	High confidence
CCNE1										x		CDK2|CDK1|GSK3B|CDK3|CDK5|CDK7|CDK4|CDK6	High confidence
CCNE2										x		CDK2|CDKN1A|CDKN1B|CDK3	Low confidence
CCNH										x		CDK7|CDK2|CDK2|CDK8|CDK9	High confidence
CCNI										x		CDK5|AKT1	High confidence
CCNK										x		CDK9|CDK12|CDK13|CDK1|CDK18	High confidence
CCNT1										x		CDK9|CDK6|NTRK1|PIP4K2A|	High confidence
CCNT2										x		CDK9|PKN1|CDK6|	High confidence
CDC23										x		NEK2|bub1b|MAPK3	Low confidence
CDC42	x		x								x		High confidence
CDC42BPA	x		x								x		High confidence
CDC42BPB	x		x								x		High confidence
CDC42BPG	x		x								x		High confidence
CDC7	x		x								x		High confidence
CDK1	x		x								x		High confidence
CDK10	x		x								x		Low confidence
CDK12	x		x								x		High confidence
CDK13	x		x								x		High confidence
CDK16	x		x								x		High confidence
CDK17	x		x								x		High confidence
CDK18	x		x								x		High confidence
CDK2	x		x								x		High confidence
CDK3	x		x								x		High confidence
CDK4	x		x								x		High confidence
CDK5	x		x								x		High confidence
CDK6	x		x								x		High confidence
CDK7	x		x								x		High confidence
CDK9	x		x								x		High confidence
CDKL5	x		x								x		High confidence
CHD4			x		x						x		Low confidence
CHEK1	x		x								x		High confidence
CIT	x		x								x		High confidence
CKAP5										x		NTRK1|CLK1|GRK5|CDK9|EPHA1	High confidence
CKS1B										x		CDK2|CDK1|CDK3|ICK|PKMYT1	High confidence
CKS2										x		CDK1|CDK2|CDK3|CAMK1D	High confidence
CLK1	x		x								x		High confidence
CLK2	x		x								x		High confidence
CLK3	x		x								x		High confidence
CLK4	x		x								x		High confidence
CLTC										x		TNK2|SRC|CDK2|WNK1|PIK3C2A|TNK1|NTRK1|GAK|CSNK1A1|CSNK1E	Low confidence
CMPK1			x	x							x		High confidence
CNOT2										x		NLK|AURKA	Low confidence
COG1										x		NTRK1	Low confidence
CSK	x		x								x		High confidence
CSNK1A1	x		x								x		High confidence
CSNK1D	x		x								x		High confidence
CSNK1E	x		x								x		High confidence
CSNK1G1	x		x								x		High confidence
CSNK1G2	x		x								x		High confidence
CSNK1G3	x		x								x		High confidence
CSNK2A1;CSNK2A3	x		x								x		High confidence
CSNK2A2	x		x								x		High confidence
CSNK2B										x		CSNK2A1|CSNK2A2	High confidence
CTTN										x		EGFR|FER|MYLK|TNK2|SYK|NTRK1|PTK2	Low confidence
CYC1									x	x	x	NTRK1	Low confidence
DCAF7										x		DYRK1A|DYRK1B|HIPK2|MAP3K1|CSNK2A1|CSNK2A2|DYRK2|AURKA|PRKACB|PRKACA|LATS2	High confidence
DCK			x	x						x	x	NTRK1	High confidence
DCTPP1			x							x	x	PLK1	High confidence
DDB1										x		CHEK1|GRK5|AURKB|DYRK1B|AURKA|NTRK1|ATM|MTOR|ABL1|GRK6	High confidence
DDR1	x		x								x		High confidence
DDR2	x		x								x		High confidence
DDX1			x		x						x		Low confidence
DDX18			x								x		Low confidence
DDX19A			x		x						x		High confidence
DDX31			x		x						x		High confidence
DDX3X			x		x		x			x	x	NTRK1|SRPK2|RPS6KB2|CDK2|ILK|BTK|IKBKE|CSNK2A1	Low confidence
DDX3X;DDX3Y			x				x				x		Low confidence
DDX42			x		x					x	x	NTRK1|RPS6KA4	Low confidence
DDX6			x		x						x		Low confidence
DHCR24								x		x	x	IKBK|EGFR	High confidence
DHX30			x		x					x	x	EIF2AK2|NTRK1|GRK5	Low confidence
DHX9			x				x				x		Low confidence
DKC1										x		NTRK1|CSNK2A1	Low confidence
DMPK	x		x								x		High confidence
DNAJA1			x								x		High confidence
DNAJB11										x		ROCK2|ILK|ERBB3|NTRK1	Low confidence
DNAJC3										x		EIF2AK2|EIF2AK3	Low confidence
DNAJC9										x		NTRK1	Low confidence
DSP										x			Low confidence
DYNLL1										x		PAK1|NEK9|PRKACB|PRKCZ|TLK1|TLK2|MASTL|MAST1|NEK6|DYRK1B|DYRK1A|GSK3B|STK26|STK24|CSNK1A1|PRKACA|STK25	High confidence
DYNLL2										x		PAK1|NEK9|CSNK1A1|DYRK1A	High confidence
DYRK1A	x		x								x		High confidence
DYRK1B	x		x								x		High confidence
EFS											x		Low confidence
EGFR	x		x								x		High confidence
EIF2AK1	x		x								x		High confidence
EIF2B1										x		NTRK1|STK11|EGFR	Low confidence
EIF2S3;EIF2S3L			x			x				x	x	NTRK1|CDK2|GRK5|MAPK6	Low confidence
EIF3J										x		CSNK2A1|CSNK2A2|NTRK1	High confidence
EIF5B			x			x					x		Low confidence
EPHA1	x		x								x		High confidence
EPHA2	x		x								x		High confidence
EPHA4	x		x								x		High confidence
EPHA5	x		x								x		High confidence
EPHA7	x		x								x		High confidence
EPHB1	x		x								x		High confidence
EPHB2	x		x								x		High confidence
EPHB3	x		x								x		High confidence
EPHB4	x		x								x		High confidence
EPHB6	x	x	?								x		High confidence
ERBB3	x		x								x		High confidence
ERBB4	x										x		High confidence
ERCC2			x		x					x	x	CDK7|NTRK1	High confidence
ERLIN2										x		NTRK1|STK3	Low confidence
ERN1	x		x								x		High confidence
ERN2	x		x								x		High confidence
ETFB			x					x		x	x	NTRK1|PRKACB	Low confidence
EWSR1			x								x		Low confidence
EXOC4										x		NTRK1|EGFR	High confidence
FADS2										x		EGFR|NTRK1	Low confidence
FAH										x		EGFR	Low confidence
FAM222B										x		NLK	Low confidence
FAM58A;FAM58BP										x		CDK10	High confidence
FAM83A										x			High confidence
FAM83B										x		GAK|CSNK1E|CSNK1A1	High confidence
FANCD2										x		ATM|NTRK1|ATR|CDK2	Low confidence
FANCI										x		ILK|NTRK1|ATM|NEK6|CAMKK2	High confidence
FARSB			x							x	x	NTRK1|EIF2AK2	Low confidence
FDPS										x		FGFR1|NTRK1|IGF1R|EGFR	Low confidence
FECH									x	x	x	ATM	High confidence
FER	x		x								x		High confidence
FES	x		x								x		High confidence
FGFR1	x		x								x		High confidence
FGR	x		x								x		High confidence
FIBP										x		CDK5|GSK3B	High confidence
FLAD1			x								x		Low confidence
FLNB										x		MAP2K4|CDK2|MAPK8|MAP3K1	High confidence
FLT3	x		x								x		High confidence
FLT4	x		x								x		High confidence
FRK	x		x								x		High confidence
FYN	x		x								x		High confidence
GAK	x		x								x		High confidence
GALK1			x								x		High confidence
GAPVD1										x		CSNK1E|CSNK1D|AURKA|FGFR2|CSNK1A1|NTRK1|TSSK1B	High confidence
GARS			x								x		High confidence
GEMIN4										x		NTRK1|ILK|CDK4|GSK3B|GRK5	Low confidence
GFPT1										x		NTRK1|PRKAB2|MAPK8|PRKAA2|	Low confidence
GLO1										x		MAP3K13|IKBKG|	Low confidence
GNAI2			x			x					x		Low confidence
GNB2						x					x		Low confidence
GRAMD1A			x								x		High confidence
GRB2										x		cell surface growth facotr receptors	High confidence
GRK6	x		x								x		Low confidence
GSK3A	x		x								x		High confidence
GSK3B	x		x								x		High confidence
GSKIP										x		GSK3B|GSK3A	High confidence
GSPT2			x			x				x	x	PIP4K2C|CLK3|CLK2|SMG1	Low confidence
GTPBP4			x			x				x	x	NTRK1|SRPK2|CSNK2A2|EIF2AK2	Low confidence
HBG2;HBG1									x		x		Low confidence
HCK	x		x								x		High confidence
HINT1										x		CDK7|CDK9	Low confidence
HIST2H2BE;HIST1H2BB;HIST1H2BO;HIST1H2BJ;HIST3H2BB;HIST1H2BA										x		HIPK2|STK4|CDK9|LATS2|STK38|AURKB|VRK1|MAP4K4|RPS6KA5|PRKACA|CDK2	Low confidence
HMOX2									?				Low confidence
HSP90AB2P			x								x		High confidence
HSP90B1			x				x				x		Low confidence
HSPA5			x				x				x		Low confidence
HSPA8			x				x				x		Low confidence
IARS2			x								x		Low confidence
ICK	x		x								x		High confidence
IGF1R	x		x								x		High confidence
IGF2BP3										x		AURKA|EIF2AK2|NTRK1|CDK2|	Low confidence
IKBKE	x		x								x		High confidence
ILK	x	x	?								x		Low confidence
IMPDH2			x							x	x	AKT1|CDK2|STKLD1|NTRK1|CLK1|IKBKE|MAPK1	Low confidence
INA										x		NTRK1	Low confidence
INCENP										x		AURKA|AURKB	High confidence
INPPL1										x		ABL1|INSR|EGFR|NTRK1|MAP3K13|MET|LRRK1	High confidence
INSR	x		x								x		High confidence
IPO7										x		RPS6KB2|NTRK1|CDK2|ILK	High confidence
IRAK1	x		x								x		High confidence
IRAK3	x	x	?								x		High confidence
IRAK4	x		x								x		High confidence
JAK1	x	?	?								x		High confidence
JAK2	x	?	?								x		High confidence
KIAA0195										x		CDK5	High confidence
KIT	x		x								x		High confidence
LAGE3										x		TP53RK	High confidence
LASP1										x		ILK	High confidence
LATS1	x		x								x		High confidence
LCK	x		x								x		High confidence
LIMK1	x		x								x		High confidence
LIMK2	x		x								x		High confidence
LMAN1										x		NTRK1	Low confidence
LYN	x		x								x		High confidence
MAP2K1	x		x								x		High confidence
MAP2K2	x		x								x		High confidence
MAP2K3	x		x								x		High confidence
MAP2K4	x		x								x		Low confidence
MAP2K5	x		x								x		High confidence
MAP2K6	x		x								x		High confidence
MAP3K1	x		x								x		High confidence
MAP3K11	x		x								x		High confidence
MAP3K12	x		x								x		High confidence
MAP3K2	x		x								x		High confidence
MAP3K3	x		x								x		High confidence
MAP3K4	x		x								x		High confidence
MAP3K5	x		x								x		High confidence
MAP3K6	x		x								x		High confidence
MAP4K1	x		x								x		High confidence
MAP4K2	x		x								x		High confidence
MAP4K3	x		x								x		High confidence
MAP4K4	x		x								x		High confidence
MAP4K5	x		x								x		High confidence
MAPK1	x		x								x		High confidence
MAPK10	x		x								x		High confidence
MAPK11	x		x								x		High confidence
MAPK14	x		x								x		High confidence
MAPK15	x		x								x		High confidence
MAPK3	x		x								x		High confidence
MAPK6	x		x								x		High confidence
MAPK7	x		x								x		High confidence
MAPK8	x		x								x		High confidence
MAPK9	x		x								x		High confidence
MAPKAPK2	x		x								x		High confidence
MAPKAPK3	x		x								x		High confidence
MAPKAPK5	x		x								x		High confidence
MARK2	x		x								x		High confidence
MARK3	x		x								x		High confidence
MARK4	x		x								x		High confidence
MAT2A			x							x	x	NTRK1|GRK5	High confidence
MCM4			x		x						x		Low confidence
MDH1										x		NTRK1|PDXK|AKT1|EGFR	Low confidence
MDN1			x				x			x	x	GSK3A|STK17B|LRRK2	Low confidence
MED23										x		CDK8|CDK19|DYRK1B|PHKB|PHKG2|AGK|RIOK1|DYRK1A|ROCK1|NTRK1	Low confidence
MELK	x		x								x		High confidence
MERTK	x		x								x		High confidence
MET	x		x								x		High confidence
MFAP1										x		NTRK1|CDK2|CSNK2A1	Low confidence
MINK1	x		x								x		High confidence
MLLT1										x		CDK9|PIP4K2A|CAMKV|CSNK2A1	Low confidence
MLST8										x		MTOR	High confidence
MNAT1										x		CDK7|CDK2|ICK	High confidence
MOB1A;MOB1B										x		LATS1|LATS2|STK38L|STK38|STK3|STK4	High confidence
MST1R	x		x								x		High confidence
MTOR	x										x		High confidence
MYH10			x				x			x	x	BMP2K|DAPK3|PIK3C2A|LYN	High confidence
MYH14			x								x		Low confidence
MYLK	x		x								x		High confidence
MYLK3	x		x								x		High confidence
NASP										x			High confidence
NAT10			x								x		Low confidence
NCL			x								x		Low confidence
NDUFA13			x								x		Low confidence
NEK1	x		x								x		High confidence
NEK2	x		x								x		Low confidence
NEK3	x		x								x		High confidence
NEK7	x		x								x		High confidence
NEK9	x		x								x		High confidence
NLK	x		x								x		High confidence
NME2			x	x							x		High confidence
NME2P1			x	x							x		Low confidence
NNT			x								x		Low confidence
NPM1										x		CDKN2A|PRKCA|AURKA|RPS6KB2|NTRK1	High confidence
NQO1								x			x		High confidence
NQO2								x		x	x	RPS6KA2	High confidence
NRK	x		x								x		High confidence
NTRK1	x		x								x		High confidence
NUAK1	x		x								x		High confidence
NUAK2	x		x								x		High confidence
OLA1			x			x	x			x	x	NTRK1|GRK5	Low confidence
OPA1			x			x				x	x	EPHA1|NTRK1|EGFR	Low confidence
OSBPL3										x		AURKA	High confidence
OSBPL8										x		NTRK1	Low confidence
OSGEP										x		TP53RK|RYK|EEF2K	High confidence
PAG1										x		CSK|ABL1|FYN|NTRK3|ZAP7|LCK|LYN|SYK	High confidence
PAICS			x							x	x	NTRK1|CDK2	Low confidence
PAK2	x		x								x		High confidence
PAK4	x		x								x		High confidence
PAK6	x		x								x		High confidence
PASK	x		x								x		Low confidence
PCBP2;PCBP3										x		CASK|NTRK1|CDK2|CDK9	Low confidence
PCYT1A			x								x		Low confidence
PDCD10										x		STK24|STK25|STK26	High confidence
PDCD11										x		NTRK1	High confidence
PDGFRB	x		x								x		High confidence
PDPK1;PDPK2P	x		x								x		High confidence
PDXK			x	x							x		High confidence
PEBP1			x							x	x	RAF1|AKT1|MAP2K1|MAPK1|ADRBK1	Low confidence
PFKP			x	x							x		High confidence
PGD										x		RPS6KA1|CDK4|CDK2	Low confidence
PGRMC1									x		x		Low confidence
PHKA1										x		PHKG2	Low confidence
PHKA2										x		RAF1|PHKG2	High confidence
PHKG2	x		x								x		High confidence
PI4KA	x		x								x		High confidence
PI4KB	x		x								x		High confidence
PIGT										x		NTRK1	Low confidence
PIK3C2A	x		x								x		High confidence
PIK3C2B	x		x								x		High confidence
PIK3C3	x		x								x		High confidence
PIK3CA	x		x								x		High confidence
PIK3CB	x		x								x		High confidence
PIK3CD	x		x								x		High confidence
PIK3CG	x		x								x		High confidence
PIK3R1										x			High confidence
PIK3R2										x			High confidence
PIK3R3										x			High confidence
PIK3R4										x			High confidence
PIM1	x		x								x		High confidence
PIM2	x		x								x		High confidence
PIM3	x		x								x		High confidence
PIP4K2A	x		x								x		High confidence
PIP4K2B	x		x								x		High confidence
PIP4K2C	x		x								x		High confidence
PKMYT1	x		x								x		High confidence
PKN1	x		x								x		High confidence
PKN2	x		x								x		High confidence
PKN3	x		x								x		Low confidence
PLK1	x		x								x		High confidence
PLK4	x		x								x		High confidence
PPP1CA										x		LMTK2|AURKA|EIF2AK2|AKAP11|CDK4|IKBKB|GSK3B|MST1R|AATK|CSNK2B|PRKAR1A|PKM|STK24|CHUK|MAP4k4 and many more (35)	Low confidence
PRDX1										x		NTRK1|PRKDC|CDK1|CDK2|ABL1	High confidence
PRDX3										x		MAP3K13|NEK6|MARK2|IKBKB|MAPK3|CDK2	High confidence
PRKAA1	x		x								x		High confidence
PRKAA2	x		x								x		High confidence
PRKAB1										x		PRKAA1|PRKAA2|ULK1|MAP3K7|MAPK6|MAST3|NEK4	High confidence
PRKAB2										x		PRKAA1|PRKAA2|PHKG2|ULK1|MAP3K15|MAP3K6|MAP3K5|MAST3|PRKDC	High confidence
PRKACA	x	x	?								x		High confidence
PRKACB	x		x								x		High confidence
PRKACG	x		x								x		High confidence
PRKAG1			x								x		High confidence
PRKAG2			x								x		High confidence
PRKAR2A			x							x	x	PRKACB|PRKACA|GSK3B|CSNK1E	High confidence
PRKCA	x		x								x		High confidence
PRKCB	x		x								x		High confidence
PRKCD	x		x								x		High confidence
PRKCE;PRKCH	x		x								x		High confidence
PRKCI	x		x								x		High confidence
PRKCQ	x		x								x		High confidence
PRKCZ	x		x								x		High confidence
PRKD1	x		x								x		High confidence
PRKD2	x		x								x		High confidence
PRKD3	x		x								x		High confidence
PRKDC	x		x								x		High confidence
PRKG1	x		x								x		High confidence
PRKX	x		x								x		High confidence
PRKX;PRKY	x		x								x		High confidence
PRMT5										x		JAK2|CDK8|CDK19|RIOK1|CSNK1E|NTRK1|CDK4	High confidence
PSMC4			x				x			x	x	NTRK1|MAP3K5	Low confidence
PSMD3										x		NTRK1|CDK2	Low confidence
PSMD6							x				x		Low confidence
PSMD7										x		NTRK1	Low confidence
PTCD3										x		NTRK1|ERBB3	Low confidence
PTK2	x		x								x		High confidence
PTK2B	x		x								x		High confidence
PTK6	x		x								x		High confidence
PTMA										x		STK26|CDK17|CDK2|CDK4|CDK1	Low confidence
PTPN1										x		EGFR|JAK2|IGF1R|INSR|NTRK1|TYK2|LTK|NTRK3|NTRK2|CSNK2A1|SRC|GSK3B	High confidence
PXN										x		PTK2|ALK|CSK|FYN|ILK|LCK|MAPK1|MATK|PAK4|SRC	High confidence
PYCR1										x		NTRK1	Low confidence
Q6ZSR9	x		x								x		High confidence
RAB10			x			x				x	x	MAP3K15|AURKA	Low confidence
RAB11A;RAB11B			x			x					x		Low confidence
RAB14			x			x					x		Low confidence
RAB1A			x			x					x		Low confidence
RAB21			x			x					x		High confidence
RAB27A			x			x					x		Low confidence
RAB6A			x			x				x	x	TGFBR	Low confidence
RAC1			x							x	x	PAK1|PAK2|PAK3|MAP3K1|CDC42BPG|MAP3K11|MAP3K4|PAK4|PAK7|LRRK2|CDK2|PTK2|LATS1	Low confidence
RAN			x			x				x	x	NEK9|TYK2|IKBKB|ILK|NTRK1|ABL1|PAK4|CDK2	Low confidence
RANGAP1										x		NTRK1|TP53K|NLK	Low confidence
RASSF2										x		STK3|STK4	High confidence
RASSF3										x		STK3|STK4	High confidence
RASSF5										x		STK3|STK4|HIPK1	High confidence
RBMX;RBMXL1										x			Low confidence
RET	x		x								x		High confidence
RIOK2	x		x								x		High confidence
RIPK2	x		x								x		High confidence
RIPK3	x		x								x		High confidence
ROCK1	x		x								x		High confidence
ROCK2	x		x								x		High confidence
RPL31										x		CDK2	Low confidence
RPS3										x			Low confidence
RPS4X										x		AURKB|RPS6KB2|AURKA|NTRK1|CDK9|CDK2|CAMK2D	High confidence
RPS6KA1	x		x								x		High confidence
RPS6KA3	x		x								x		High confidence
RPS6KA4	x		x								x		High confidence
RPS6KA5	x		x								x		High confidence
RPS6KA6	x		x								x		High confidence
RPS6KB1	x		x								x		High confidence
RRP8										x		ILK	Low confidence
S100A6										x		CDK2	Low confidence
S100A8										x		CDK2|LLRK1|NUAK1|	High confidence
SAE1			x								x		Low confidence
SARNP										x		LIMK1|CSNK2B|CDK2	Low confidence
SAV1										x		STK3|STK4|LATS2|CSNK1E|LATS1	High confidence
SBK1	x		x								x		High confidence
SEPT9			x			x				x	x	STK11|NTRK1	Low confidence
SFN										x		RAF1|EGFR|MAP3K2|PLK4|MARK3|TNK1|SLK|NTRK1 and many more	Low confidence
SGTA										x		NME3|PHKA1|HK1	Low confidence
SIK2	x		x								x		High confidence
SIK3	x		x								x		High confidence
SKIV2L2			x		x						x		Low confidence
SLC25A11										x		PRKCA|NTRK1|FYN|YES1|CAMKK2|AATK	Low confidence
SLC25A5			x							x	x	ERBB3|RPS6KB2|NTRK1	High confidence
SLC25A6			x							x	x	ERBB3|CHEK2|NTRK1|FGFR3	Low confidence
SLC2A1										x		TYK2|IRAK1|ILK|JAK2|STK17B|PTK2B	Low confidence
SLK	x		x								x		High confidence
SMARCC1										x		AURKB|NTRK1|Rock1|CDK8|STK11	High confidence
SMARCE1										x		TNIK|	Low confidence
SMC1A			x							x	x	ATM|NTRK1|PLK1|EGFR|ATR|PRKAA2|CAMKK2|CDK4|CDK2|CDK8|CDK2	Low confidence
SMC2			x							x	x	EGFR|NTRK1|AURKA|EPHA1|CDK9	High confidence
SMS										x		TP53RK|NTRK1|MAPKAPK3|RPS6KA3|MAPK6	Low confidence
SNRNP200			x		x					x	x	NTRK1|IRAK1|IRAK2	High confidence
SNRPF										x		CDK2|EGFR	High confidence
SPAG9										x		PLK1|MAP2K3|MAPK14|MAP2K4|MAP3K3|ABL1	Low confidence
SRC	x		x								x		High confidence
SRPR			x							x	x	MAP3K4|NTRK1	Low confidence
SRRT			x								x		Low confidence
SRSF2			x								x		Low confidence
SSR1										x		NTRK1|ERBB3|RPS6KB2|ILK	Low confidence
STAT3										x		EGFR|SRC|JAK2|RET|MTOR and many more	High confidence
STK10	x		x								x		High confidence
STK11	x		x								x		High confidence
STK16	x		x								x		High confidence
STK17A	x		x								x		High confidence
STK24	x		x								x		High confidence
STK26	x		x								x		High confidence
STK3	x		x								x		High confidence
STK38	x		x								x		Low confidence
STK38L	x		x								x		High confidence
STK4	x		x								x		High confidence
STRADA	x	x	?								x		Low confidence
SUCLA2			x							x	x	NTRK1|EGFR	Low confidence
SUMO2										x		PRKDC|HIPK2	Low confidence
SYK	x		x								x		High confidence
TANK										x		TBK1|IKBKE	High confidence
TAOK1	x		x								x		High confidence
TAOK2	x		x								x		High confidence
TAOK3	x		x								x		High confidence
TAP1			x				x				x		Low confidence
TBK1	x		x								x		High confidence
TBKBP1										x		TBK1|IKBKE|LATS2	High confidence
TCP1			x								x		Low confidence
TEC	x		x								x		High confidence
TESK1	x		x								x		High confidence
TESK2	x		x								x		Low confidence
TEX264										x		CSNK1D|CSNK1E|CHEK2|CSNK1A1|MAP4K4|MINK1	High confidence
TGFBR1	x		x								x		High confidence
TGFBR2	x		x								x		High confidence
THRAP3			x							x	x	CLK2|SRPK3|SRPK1|SRPK2|CSNK2A2|CLK3|CLK1|PLK2|CAMKV|NTRK1|CSNK2A1	Low confidence
TMEM33										x		NTRK1	Low confidence
TNIK	x		x								x		High confidence
TNK1	x		x								x		High confidence
TNK2	x		x								x		High confidence
TOP2A			x							x	x	CSNK2A1|MAPK1|CSNK2B|GSK3B|PRKCA|SRPK1|PRKCG|PRKCB|CSNK2A2	Low confidence
TOP2B			x							x	x	NTRK1|CSNK2B	High confidence
TP53RK	x		x								x		High confidence
TPRKB										x		TP53RK|PRKACB	High confidence
TRAF2										x		RIPK1|MAP3K14|TANK|IKBK|MAP3K5|IKBKE|TBK1|CHUK|EGFR|MAP3K1|IKBKG|ERN1|PKN1|MAP3K7|RIPK2|MAP4K2|EIF2AK2|ERN2GSK3B|MAP3K8|MAPK9|MTOR|YES1|TAOK3|MAST|TNIK|RIPK3|MAP4K5|LRRK2	Low confidence
TRAF7										x		RIPK4|MAP3K3|MAP3K2|MAP2K5	Low confidence
TRRAP										x		CDK8	High confidence
TTK	x		x								x		Low confidence
TTN	x		x								x		High confidence
TUBA1C			x			x					x		Low confidence
TUBB			x			x					x		High confidence
TUBB6			x			x					x		High confidence
TUFM			x			x				x	x	CAMK1D|ERBB3|NTRK1|TSSK1B|RPS6KB2|GRK5|CDK2	Low confidence
TXN										x		MAP3K5|MELK|EGFR|MAP2K2|CDK2|	Low confidence
TYK2	x	?	?										High confidence
U2AF1;U2AF1L4			x								x		High confidence
UBA1			x								x		Low confidence
UBAP2L										x		NLK|NTRK1|ILK	Low confidence
UBASH3B										x		EGFR|SYK|AURKB|ABL1|MAP3K1|CSK	High confidence
UBE3C										x		NTRK1|TLK1|PHKA2	Low confidence
UGGT1										x		NTRK1	Low confidence
ULK1	x		x								x		High confidence
ULK3	x		x								x		High confidence
UNC119										x		LYN|LCK|FYN|RPS6KA5|ZAK|HCK|PSKH1|PRKG2|PSKH2|LIMK2|(BCR)|MAPK1	High confidence
VAT1							x						Low confidence
VDAC3			x							x	x	NTRK1|SRC	Low confidence
WEE1	x		x								x		High confidence
YARS			x							x	x	NTRK1|CDK2|EGFR	Low confidence
YES1	x		x								x		High confidence
YTHDF3;YTHDF1										x		NTRK1	Low confidence
YWHAE										x			Low confidence
YWHAG										x		RAF1|ABL1|BRAF|ARAF|LRRK2|CDK11B|LATS2|MAP3K2|MARK2|IGF1R|PI4KB|MARK3|PAK4|CDK2|AKT1|MAP3K1|GRK5|MST1R|MAPK7|KDR|NTRK1|PAK2|PAK6|TNK1|WNK1|CLK3|CLK2|DYRK1A|CLK1|PRKCA|PRKCD|PRKCB|CDK16|PRKCZ|PRKCG|PRKCQ|MAP3K3|PAK1|GSK3A|PIK3C3|CDK17	Low confidence
YWHAQ										x		RAF1|ABL1|MARK2|BRAF|PRKD1|PRKZ|MARK3|CDK11B|EGFR|PRKCQ|PRKDC|PDPK1|CDK18|PAK4|WEE1|NTRK1|ARAF|PRKD2|MAP3K2|MTOR|CDK17|SIK3|ADCK2|WNK4	Low confidence
ZAK	x		x								x		High confidence

## Sheet: S3C_DrugMatrix
Gene Name	Apitolisib	CH5132799	VS5584	BGT226	Omipalisib	Voxtalisib	Gedatolisib	PF-04691502	NVP-BEZ235	AZD6738	KU60019	CP466722	VE-822
PIK3C2A	3	3	3	5.97155	7.85873	7.13897	6.22104	5.37948	5.76722	3	3	3	3
PIK3C2B	3	3	3	6.23875	7.98414	6.40155	7.19626	7.76079	6.35574	3	3	6.23114	3
PI4KB	3	3	3	6.17009	7.82761	6.56263	3	5.92063	3	5.64222	3	6.45424	5.16179
PI4KA	3	3	3	6.49564	7.81964	6.46054	3	7.18793	3	3	3	3	7.22564
MTOR	6.55578	3	6.33617	8.52288	7.89089	3	6.90745	6.57649	7.51014	3	3	6.91608	3
PIK3CD	6.87539	7.07261	6.60057	7.64017	8.52288	5.87276	3	3	6.3746	5.81976	3	3	3
PIK3CA	8.07064	8.17308	7.44938	8.11796	8.52288	7.16293	6.79314	8.52288	6.62732	6.17418	3	3	3
PIK3CG	6.98992	7.52781	6.41857	7.23536	8.07404	7.84062	6.3097	8.1584	3	3	3	3	3
PRKDC	3	5.66723	3	8.09358	8.29158	6.64159	6.39593	5.98577	7.54264	8.52288	6.76464	3	3
ATM	3	3	3	8.52288	7.34581	3	3	3	7.88306	8.52288	8.36068	7.28866	8.52288
ATR	3	3	3	8.36975	8.18488	3	3	3	8.12149	8.52288	6.59845	6.62335	8.52288
JAK1	8.08326	7.69675	6.48016	3	3	3	3	3	3	3	3	3	3
PIK3CB	3	8.19716	3	3	3	3	3	3	3	3	3	3	3
PIK3C3	3	3	3	7.17106	3	3	3	3	6.17911	3	3	3	7.67591
PIP4K2C	3	3	3	5.49683	3	5.82229	3	3	3	3	3	3	6.06519
ACAD11	3	3	3	3	3	5.55635	3	3	3	3	3	3	6.40183
GSK3A	3	3	3	5.4673	3	3	3	3	3	3	3	3	6.05339
MAP3K1	3	3	3	3	3	3	3	3	3	3	3	3	7.3776
MAP4K4	3	3	3	3	3	3	3	3	3	3	3	3	7.14816
BUB1	3	3	3	3	3	3	3	3	3	3	3	4.88643	5.64585
BMPR1A	3	3	3	3	3	3	3	3	3	3	3	3	6.31494
BMP2K	3	3	3	3	3	3	3	3	3	3	3	3	5.86469
GSK3B	3	3	3	3	3	3	3	3	3	3	3	3	6.01213
STK4	3	3	3	3	3	3	3	3	3	3	3	3	5.50726
MYLK3	3	3	3	3	3	3	3	3	3	3	3	3	4.97899
STK11	3	3	3	3	3	3	3	3	3	3	3	3	5.17437
AAK1	3	3	3	3	3	3	3	3	3	3	3	6.21778	6.23193
ACVR1	3	3	3	3	3	3	3	3	3	3	3	7.48498	6.64454
ERN1	3	3	3	3	3	3	3	3	3	3	3	5.3247	3
Q6ZSR9	3	3	3	3	3	3	3	3	3	3	3	5.617	3
PLK4	3	3	3	3	3	3	3	3	3	3	3	6.68868	3
GAK	3	3	3	3	3	3	3	3	3	3	3	6.87344	3
NEK9	3	3	3	3	3	3	3	3	3	3	3	6.8421	3
NLK	3	3	3	3	3	3	3	3	3	3	3	5.92759	3
CDKL5	3	3	3	3	3	3	3	3	3	3	3	5.89748	3
ZAK	3	3	3	3	3	3	3	3	3	3	3	5.88395	3
AURKB	3	3	3	3	3	3	3	3	3	3	3	6.37575	3
AXL	3	3	3	3	3	3	3	3	3	3	3	6.17849	3
CSNK2A1;CSNK2A3	3	3	3	5.31222	3	3	3	3	3	3	3	6.05339	5.3906
CSNK2A2	3	3	3	5.37387	3	3	3	3	3	3	3	6.06235	5.51292
DYRK1A	3	3	3	6.03422	3	3	3	3	3	3	3	5.03168	3
IRAK3	3	3	3	5.70741	3	3	3	3	3	3	3	6.36755	3
PDGFRB	3	3	3	5.58176	3	3	3	3	3	3	3	6.55286	3
CLK1	3	3	3	6.62342	3	3	3	3	3	3	3	7.02394	3
CLK2	3	3	3	6.44166	3	3	3	3	3	3	3	6.58825	3
CSNK1D	3	3	3	3	3	6.30402	3	3	3	3	3	5.56831	3
CSNK1E	3	3	3	3	3	6.6056	3	3	3	3	3	3	3
NQO2	3	3	3	3	3	6.28534	3	3	3	3	3	3	3
PAK4	3	3	5.90294	3	3	3	3	3	3	3	3	3	3
EGFR	5.81839	3	5.81183	3	3	3	3	3	3	3	3	3	3
NEK2	5.81519	3	6.0789	3	3	3	3	3	3	3	3	3	3
FLT3	5.73857	3	3	5.51705	3	3	3	3	3	3	3	3	3
RIOK2	5.46843	4.58114	3	3	3	3	3	3	3	3	3	3	3
PRKCA	5.52653	3	3	3	3	3	3	3	3	3	3	3	3
SLK	5.56574	3	3	3	3	3	3	3	3	3	3	3	3
STK10	5.56897	3	3	3	3	3	3	3	3	3	3	3	3
FER	6.22287	3	3	3	3	3	3	3	3	3	3	3	3
TEC	6.21946	3	3	3	3	3	3	3	3	3	3	3	3
BTK	6.02094	3	3	3	3	3	3	3	3	3	3	3	3
HCK	5.96895	3	3	3	3	3	3	3	3	3	3	3	3
MET	3	3	3	3	3	3	5.95914	3	3	3	3	3	3
BCR	3	3	3	3	3	3	3	3	6.98337	3	3	3	3
MAP4K2	3	3	3	3	3	3	3	3	5.49163	3	3	3	3
NUAK1	3	3	3	3	3	3	3	3	6.11213	3	3	3	3
FECH	3	3	3	5.59388	3	3	3	3	5.44291	3	3	3	3
TP53RK	3	3	3	4.65652	3	3	3	3	3	3	3	3	3

## Sheet: S3D_DrugTargets
Drug	Gene Name	Relative Intensity of DMSO	Relative Intensity 1nM	Relative Intensity 3nM	Relative Intensity 10nM	Relative Intensity 30 nM	Relative Intensity 100 nM	Relative Intensity 300 nM	Relative Intensity 1000 nM	Relative Intensity 3000 nM	Relative Intensity 10000 nM	Intensity	Intensity Type	Slope	Bottom	Top	Inflection	EC50	Correction Factor	Apparent Kd [nM]
Apitolisib	BTK	1	1.103	1.19888	1.13389	1.28433	1.17144	0.911327	0.993562	0.782265	0.615979	19362000000	Normalized.LFQ.intensity.	0.975991	0.535491	1.14248	1871.83	1871.83	0.509093	952.934
Apitolisib	EGFR	1	1.04707	1.16792	1.11236	1.25047	1.08782	0.843562	0.914133	0.689016	0.491669	950700000	Normalized.LFQ.intensity.	0.82719	0.31421	1.11036	2451.02	2451.02	0.619816	1519.18
Apitolisib	FER	1	1.11828	1.34206	1.31211	1.30645	1.19742	1.00224	0.958385	0.82866	0.669658	2812700000	Normalized.LFQ.intensity.	0.987354	0.629174	1.21404	1163.3	1163.3	0.514567	598.598
Apitolisib	FLT3	1	1.16001	1.37712	1.2257	1.28288	1.22979	1.0035	1.13042	0.851769	0.446344	93439000	Normalized.LFQ.intensity.	5.57259	0.445323	1.1764	3122.28	3122.28	0.58473	1825.69
Apitolisib	HCK	1	1.13643	1.27727	1.17899	1.28719	1.174	0.912045	1.00247	0.840296	0.646835	5612400000	Normalized.LFQ.intensity.	0.846387	0.548196	1.17252	1951.94	1951.94	0.550284	1074.12
Apitolisib	JAK1	1	0.998244	0.994381	0.756567	0.604853	0.472117	0.355991	0.337512	0.30151	0.280278	2183600000	Normalized.LFQ.intensity.	0.947543	0.300134	1.02918	22.538	22.538	0.366286	8.25537
Apitolisib	MLST8	1	0.891932	1.4612	1.22995	1.37559	1.41351	1.02472	0.779914	0.529259	0.361855	173230000	Normalized.LFQ.intensity.	1.59207	0.370452	1.22101	961.365	961.365	0.204991	197.071
Apitolisib	MTOR	1	1.16991	1.37681	1.39	1.35802	1.39987	1.05264	0.897033	0.610913	0.436168	2862300000	Normalized.LFQ.intensity.	1.33256	0.401515	1.27554	1164.72	1164.72	0.23878	278.112
Apitolisib	NEK2	1	1.14123	1.38801	1.15418	1.30415	1.2163	0.964242	0.853564	0.948802	0.566359	114690000	Normalized.LFQ.intensity.	0.759641	0.432801	1.20084	2484.74	2484.74	0.615933	1530.43
Apitolisib	PIK3CA	1	1.68008	1.54882	1.37107	1.13226	0.475589	0.284179	0.0645631	0.0501665	0	370370000	Normalized.LFQ.intensity.	1.57979	0.0555667	1.418	67.3764	67.3764	0.126141	8.4989
Apitolisib	PIK3CD	1	1.28169	1.60583	1.52396	0.968626	0.880942	0.644673	0.347368	0.385343	0	56638000	Normalized.LFQ.intensity.	0.775783	-0.00112302	1.33555	299.66	299.66	0.444611	133.232
Apitolisib	PIK3CG	1	1.11172	1.23993	1.26001	1.05542	0.796006	0.366175	0.184845	0.0276771	0	1213700000	Normalized.LFQ.intensity.	1.40023	0.0241562	1.15407	176.572	176.572	0.579633	102.347
Apitolisib	PIK3R1	1	1.41824	1.59423	1.54028	0.930048	0.507589	0.382575	0.193938	0	0.0668045	294140000	Normalized.LFQ.intensity.	1.43998	0.110166	1.38729	62.2907	62.2907	0.223955	13.9503
Apitolisib	PIK3R2	1	1.35769	1.98729	1.27835	0.773139	0.618867	0	0.235528	0	0	123980000	Normalized.LFQ.intensity.	1.35573	0.0494619	1.42897	48.5748	48.5748	0.210273	10.214
Apitolisib	PRKCA	1	1.09522	1.1993	1.25013	1.22348	1.2902	0.976001	1.022	0.934347	0.725611	554780000	Normalized.LFQ.intensity.	0.967734	0.61597	1.16288	3002.21	3002.21	0.990898	2974.88
Apitolisib	RIOK2	1	0.886095	1.08876	0.990726	1.12475	1.02606	0.77944	0.945007	0.698321	0.591549	155110000	Normalized.LFQ.intensity.	0.798283	0.404107	1.01381	3493.51	3493.51	0.97344	3400.72
Apitolisib	SLK	1	1.09174	1.15352	1.16604	1.28173	1.14618	1.02383	1.05965	0.971678	0.761995	3488900000	Normalized.LFQ.intensity.	1.28265	0.694709	1.13036	3413.32	3413.32	0.796316	2718.08
Apitolisib	STK10	1	1.19884	1.26731	1.19679	1.35312	1.23822	0.996082	1.07709	0.94019	0.7062	1346200000	Normalized.LFQ.intensity.	0.948557	0.555133	1.19791	3509.97	3509.97	0.768639	2697.9
Apitolisib	TEC	1	1.13323	1.28012	1.25862	1.32016	1.21709	0.946106	1.05462	0.907242	0.786808	1162100000	Normalized.LFQ.intensity.	0.9473	0.763135	1.19594	1125.41	1125.41	0.536081	603.308
AZD6738	ATM	1	0.769335	0.720121	0.804214	0.579373	0.45777	0.240335	0.676704	0.497939	0.34856	776110000	Normalized.LFQ.intensity.	0.544663	0.415826	0.983326	5.78442	5.78442	0.0788142	0.455894
AZD6738	ATR	1	0.809677	0.470709	0.393983	0	0	0	0.300489	0	0	48317000	Normalized.LFQ.intensity.	1.09926	0.0478103	0.999732	3.16407	3.16407	0.248737	0.787022
AZD6738	PI4KB	1	0.961919	1.08221	1.09375	1.01988	1.12614	1.08035	1.04199	0.859801	0.578152	271900000	Normalized.LFQ.intensity.	3.08538	0.56011	1.05209	3465.81	3465.81	0.657614	2279.16
AZD6738	PIK3CA	1	0.808641	0.849068	0.898676	0.817823	0.85903	0.874957	1.04317	0.837841	0.008617	426980000	Normalized.LFQ.intensity.	4.86427	-0.0329315	0.893763	5308.47	5308.47	0.126141	669.614
AZD6738	PIK3CD	1	0.829492	0.838511	0.887903	0.807802	0.904223	0.86471	0.943808	0.756478	0.509585	106690000	Normalized.LFQ.intensity.	5.06054	0.508523	0.884745	3406.14	3406.14	0.444611	1514.41
AZD6738	PIK3R1	1	0.82026	0.81175	0.763893	0.87242	0.883618	1.06997	0.98305	0.718911	0.0553223	299110000	Normalized.LFQ.intensity.	7.01303	0.0546612	0.900626	3609.26	3609.26	0.223955	808.312
AZD6738	PRKDC	1	0.736731	0.442358	0.472318	0.233191	0.216395	0.303643	0.252583	0.368626	0.46469	13590000000	Normalized.LFQ.intensity.	1.34591	0.317472	1.00674	1.30551	1.30551	0.487244	0.6361
BGT226	ATM	1	1.11716	0.997555	0.364647	0.124738	0.111522	0.100115	0.186605	0.157531	0.137209	1167100000	Normalized.LFQ.intensity.	3.26512	0.13515	1.05633	7.10378	7.10378	0.0788142	0.559879
BGT226	ATR	1	1.11911	1.35345	0.999135	0.515504	0.632671	0.247547	0.364282	0.289231	0.434987	94372000	Normalized.LFQ.intensity.	2.68423	0.389588	1.15614	17.1595	17.1595	0.248737	4.26821
BGT226	CLK1	1	1.19507	1.19796	0.930248	0.923836	0.681818	0.57374	0.279709	0	0	96322000	Normalized.LFQ.intensity.	0.71931	-0.130196	1.11743	320.874	320.874	0.741724	238
BGT226	CLK2	1	1.12803	1.12701	0.990948	0.959517	0.983182	0.673095	0.451345	0.348996	0.219465	70655000	Normalized.LFQ.intensity.	1.03072	0.211546	1.0656	419.249	419.249	0.86272	361.694
BGT226	CSNK2A1;CSNK2A3	1	1.04755	1.22037	1.06167	1.055	1.06132	1.10141	1.02237	0.919818	0.486569	1862800000	Normalized.LFQ.intensity.	2.38139	0.383004	1.07442	4872.76	4872.76	1.32012	4872.76
BGT226	CSNK2A2	1	1.1808	1.33985	1.10439	1.06535	1.15718	1.35628	1.0899	0.883051	0.367271	2712100000	Normalized.LFQ.intensity.	2.21844	0.250528	1.16722	4227.97	4227.97	1.69282	4227.97
BGT226	CSNK2B	1	1.10889	1.10018	1.08325	1.05623	0.983775	0.96867	0.820461	0.775322	0.386755	1640100000	Normalized.LFQ.intensity.	0.622074	-1.69564	1.06897	63606.4	63606.4	1.63707	63606.4
BGT226	DCAF7	1	1.08577	1.16268	1.20463	1.07076	0.934082	0.922709	0.81555	0.564502	0.290976	114140000	Normalized.LFQ.intensity.	0.65018	-0.340991	1.1054	6806.03	6806.03	0.932645	6347.61
BGT226	DYRK1A	1	1.03017	0.946531	1.11866	1.06309	0.9665	0.6721	0.624427	0.322748	0.144252	216050000	Normalized.LFQ.intensity.	0.844253	0.00470183	1.04057	1181.34	1181.34	0.782357	924.233
BGT226	FECH	1	1.1136	1.22344	1.14682	1.099	1.08035	1.07384	0.90693	0.744816	0.509497	1273400000	Normalized.LFQ.intensity.	1.10188	0.388647	1.11711	2547.51	2547.51	1.01412	2547.51
BGT226	FLT3	1	1.10482	1.21812	1.07672	0.992492	1.17182	0.959207	0.910867	0.74009	0.500905	170480000	Normalized.LFQ.intensity.	0.836814	0.161024	1.09469	5199.87	5199.87	0.58473	3040.52
BGT226	GSK3A	1	1.1287	1.17511	1.01176	1.09648	1.07623	1.04518	0.873889	0.813473	0.427616	6391900000	Normalized.LFQ.intensity.	1.00774	0.0599507	1.08296	6131.43	6131.43	0.556077	3409.55
BGT226	IRAK3	1	1.16222	1.29863	1.09042	1.21433	1.26432	1.11051	0.961343	0.940824	0.569721	1155000000	Normalized.LFQ.intensity.	1.14891	0.379972	1.16587	4372.46	4372.46	0.448604	1961.5
BGT226	MLST8	1	1.3121	1.55312	0.908633	0.646968	0	0	0.61425	0	0	42997000	Normalized.LFQ.intensity.	1.96989	0.120252	1.25975	22.6393	22.6393	0.204991	4.64085
BGT226	MTOR	1	1.10457	1.07147	0.713495	0.484103	0.416648	0.341732	0.422723	0.347464	0.324639	1695100000	Normalized.LFQ.intensity.	2.04783	0.373577	1.07192	10.5755	10.5755	0.23878	2.52522
BGT226	OSGEP	1	1.04607	1.07138	1.0706	0.894288	0.857919	0.71222	0.72219	0.36496	0.182882	201410000	Normalized.LFQ.intensity.	0.499336	-0.566688	1.05352	7155.84	7155.84	1.0774	7155.84
BGT226	PDGFRB	1	1.33307	1.48995	1.48712	1.44641	1.33827	1.23842	1.05468	0.872533	0.561468	92395000	Normalized.LFQ.intensity.	1.04427	0.383243	1.35083	2619.63	2619.63	1.04963	2619.63
BGT226	PI4KA	1	1.15109	1.19299	1.13784	0.998461	0.942569	0.698398	0.563115	0.359642	0.251102	1368900000	Normalized.LFQ.intensity.	0.82907	0.193788	1.12416	477.122	477.122	0.669467	319.418
BGT226	PI4KB	1	1.19117	1.17658	1.09497	1.0142	0.92028	0.688093	0.594885	0.289705	0.120518	524930000	Normalized.LFQ.intensity.	0.676376	-0.0908054	1.12855	1027.88	1027.88	0.657614	675.949
BGT226	PIK3C2A	1	1.20286	1.17804	1.26697	1.16245	1.24178	0.798131	0.719847	0.478124	0.18206	284140000	Normalized.LFQ.intensity.	0.899369	0.0374089	1.17979	1453.73	1453.73	0.73446	1067.7
BGT226	PIK3C2B	1	1.42807	2.25427	1.18105	1.42824	1.44897	0.937934	0.778332	0.513734	0.131825	164340000	Normalized.LFQ.intensity.	0.844389	-0.0077486	1.48779	1048.25	1048.25	0.550536	577.101
BGT226	PIK3C3	1	1.16054	1.6696	1.39508	1.21769	0.760087	0.525823	0.438835	0.430884	0.41443	40363000	Normalized.LFQ.intensity.	2.24508	0.438587	1.30654	80.9871	80.9871	0.832776	67.4441
BGT226	PIK3CA	1	1.15386	1.31382	1.12286	1.00933	0.393522	0.233416	0.322156	0.172122	0.0282378	718970000	Normalized.LFQ.intensity.	2.42695	0.182111	1.15207	60.4201	60.4201	0.126141	7.62144
BGT226	PIK3CD	1	1.03321	1.18952	1.17052	0.918379	0.543957	0.393557	0.512543	0.418013	0.293465	157320000	Normalized.LFQ.intensity.	2.29962	0.403791	1.09794	51.5049	51.5049	0.444611	22.8997
BGT226	PIK3CG	1	1.15593	1.2491	0.95985	0.912784	0.583573	0.282173	0.209104	0.0780311	0.0215827	1263800000	Normalized.LFQ.intensity.	1.05493	0.0525203	1.1252	100.344	100.344	0.579633	58.1627
BGT226	PIK3R1	1	1.07906	1.49183	1.11357	0.959167	0.375052	0.177998	0.316134	0.146131	0.085089	447800000	Normalized.LFQ.intensity.	2.21774	0.176092	1.17815	53.0237	53.0237	0.223955	11.8749
BGT226	PIK3R2	1	1.00757	1.58876	1.07736	1.0198	0.47484	0.226866	0.337037	0.178024	0.0968619	190070000	Normalized.LFQ.intensity.	2.06957	0.198741	1.17628	64.247	64.247	0.210273	13.5094
BGT226	PIP4K2C	1	1.16396	1.33151	1.13828	1.32089	1.34516	1.26624	1.18726	0.894093	0.525791	86415000	Normalized.LFQ.intensity.	2.86048	0.499748	1.22268	3185.41	3185.41	1.00399	3185.41
BGT226	PRKDC	1	1.08538	1.13299	0.912584	0.579448	0.466175	0.424933	0.474392	0.442357	0.439045	26954000000	Normalized.LFQ.intensity.	2.35159	0.448219	1.07325	16.5452	16.5452	0.487244	8.06154
BGT226	TP53RK	1	1.13015	0.954781	1.08527	0.907475	0.750768	0.798432	0.801727	0.368605	0.177699	220160000	Normalized.LFQ.intensity.	0.479683	-1.09834	1.04097	22053.5	22053.5	1.09954	22053.5
CH5132799	JAK1	1	0.951468	0.938841	0.749314	0.819429	0.497055	0.397281	0.399786	0.33392	0.243747	2942600000	Normalized.LFQ.intensity.	0.718454	0.266649	0.995897	54.8826	54.8826	0.366286	20.1027
CH5132799	PIK3CA	1	0.684282	0.787059	0.626475	0.641979	0.307506	0.165814	0.0847328	0.0891058	0	545120000	Normalized.LFQ.intensity.	0.480006	-0.0867765	0.952981	53.2182	53.2182	0.126141	6.71298
CH5132799	PIK3CB	1	0.878433	1.22932	0	0	0	0	0	0	0	20927000	Normalized.LFQ.intensity.	11.5131	-0.00131795	1.03597	6.35102	6.35102	1	6.35102
CH5132799	PIK3CD	1	0.867526	0.894174	0.712058	0.784859	0.592373	0.584329	0.360063	0.293556	0.309328	94543000	Normalized.LFQ.intensity.	0.416359	0.129498	0.985785	190.288	190.288	0.444611	84.6043
CH5132799	PIK3CG	1	0.915769	0.904249	0.696514	0.734455	0.225426	0.124633	0.0427902	0	0.00407727	1564900000	Normalized.LFQ.intensity.	1.12478	-0.000990513	0.942492	51.1729	51.1729	0.579633	29.6615
CH5132799	PIK3R1	1	0.699034	0.677834	0.621581	0.533624	0.307253	0.207879	0.15527	0.0746795	0.0411267	360790000	Normalized.LFQ.intensity.	0.360436	-0.113119	0.986764	41.3279	41.3279	0.223955	9.25561
CH5132799	PIK3R2	1	0.622054	0.917526	0.643109	0.755909	0.326111	0.197534	0	0.118194	0	127160000	Normalized.LFQ.intensity.	1.31672	0.0325944	0.82666	82.2581	82.2581	0.210273	17.2966
CH5132799	PRKDC	1	1.24729	1.30845	1.07841	1.32061	1.08522	0.882989	1.00541	0.791344	0.489699	40586000000	Normalized.LFQ.intensity.	0.722352	0.164655	1.17935	4415.97	4415.97	0.487244	2151.66
CH5132799	RIOK2	1	1.08174	1.06604	0.793783	1.00483	0.780781	0.784772	0.703675	0.519135	0.275883	152120000	Normalized.LFQ.intensity.	0.413552	-0.805181	1.02956	26949.3	26949.3	0.97344	26233.6
CP466722	AAK1	1	0.997137	0.946176	0.893697	0.986318	0.890776	0.89141	0.689873	0.580438	-	919050000	Normalized.LFQ.intensity.	1.2827	0.503942	0.962011	813.664	813.664	0.74435	605.651
CP466722	ACVR1	1	1.02434	1.055	0.812813	0.750118	0.399428	0.261433	0.124897	0.0939198	-	185500000	Normalized.LFQ.intensity.	0.982595	0.0774028	1.03327	57.9598	57.9598	0.564794	32.7354
CP466722	ATM	1	0.838502	1.0102	1.18037	1.1373	0.912588	0.975343	0.538473	0.424311	-	861100000	Normalized.LFQ.intensity.	3.20701	0.419026	1.01439	652.732	652.732	0.0788142	51.4446
CP466722	ATR	1	0.906298	1.09921	1.00663	0.989239	0.945674	1.07768	0.669856	0.442067	-	54898000	Normalized.LFQ.intensity.	8.68096	0.442043	1.00354	956.998	956.998	0.248737	238.041
CP466722	AURKB	1	0.92949	0.992109	1.04971	1.22752	0.931847	0.93236	0.625775	0.448189	-	335550000	Normalized.LFQ.intensity.	1.74589	0.397828	1.02748	731.473	731.473	0.575506	420.968
CP466722	AXL	1	0.99562	0.939854	1.16375	0.991265	0.874785	0.889819	0.745835	0.611974	-	148330000	Normalized.LFQ.intensity.	0.807635	0.438903	1.01904	1088.49	1088.49	0.609094	662.991
CP466722	BUB1	1	1.0368	0.956542	0.807114	0.914106	0.687457	0.801887	0.488488	0.258322	-	80601000	Normalized.LFQ.intensity.	0.459981	-1.2634	0.994171	15639.5	15639.5	0.83051	12988.7
CP466722	CDKL5	1	0.905241	1.18081	0.885986	1.21553	0.75288	0.747688	0.518692	0	-	27876000	Normalized.LFQ.intensity.	1.02539	-0.328733	1.01668	1266.25	1266.25	1	1266.25
CP466722	CLK1	1	0.860894	1.01508	0.725906	0.827142	0.471029	0.26201	0	0	-	83252000	Normalized.LFQ.intensity.	0.967411	-0.0732332	0.945586	127.59	127.59	0.741724	94.6362
CP466722	CLK2	1	0.718803	0.995973	0.908517	0.916136	0.643211	0.563102	0.286193	0.189878	-	29953000	Normalized.LFQ.intensity.	1.02331	0.119426	0.919074	299.147	299.147	0.86272	258.08
CP466722	CSNK1D	1	0.863938	0.931126	0.767626	0.865198	0.812273	0.769033	0.580509	0.46545	-	1346600000	Normalized.LFQ.intensity.	0.51509	0.0330438	0.927839	2856.12	2856.12	0.946043	2702.01
CP466722	CSNK2A1;CSNK2A3	1	1.12843	1.08237	1.02114	1.12605	1.00702	1.00235	0.781533	0.618172	-	973810000	Normalized.LFQ.intensity.	1.59677	0.553664	1.06577	884.311	884.311	1.32012	884.311
CP466722	CSNK2A2	1	1.04333	1.04269	1.10665	1.20374	0.973022	0.978962	0.728549	0.537351	-	1719500000	Normalized.LFQ.intensity.	1.49228	0.454812	1.06867	866.26	866.26	1.69282	866.26
CP466722	CSNK2B	1	1.30512	1.16071	1.26573	1.32132	1.05021	1.09912	0.749696	0.558184	-	848420000	Normalized.LFQ.intensity.	1.57709	0.482226	1.19467	755.318	755.318	1.63707	755.318
CP466722	DYNLL1	1	1.55383	1.15975	0.971417	1.33038	1.08489	0.721368	0.321863	0.200389	-	280780000	Normalized.LFQ.intensity.	1.84935	0.197856	1.20329	317.137	317.137	0.769672	244.091
CP466722	DYNLL2	1	1.02247	1.00634	0.970802	1.00246	0.702965	0.740774	0.296731	0	-	25470000	Normalized.LFQ.intensity.	0.845358	-0.400301	1.00989	1036.26	1036.26	0.620113	642.599
CP466722	DYRK1A	1	0.98384	1.11915	0.961269	0.866343	0.946075	0.877873	0.738558	0.476915	-	157970000	Normalized.LFQ.intensity.	0.686199	-0.841716	1.00322	11882.7	11882.7	0.782357	9296.52
CP466722	ERN1	1	0.979283	0.98848	1.03688	0.956708	0.846479	0.847622	0.800706	0.607153	-	200090000	Normalized.LFQ.intensity.	0.534469	0.0800741	1.00521	6071.27	6071.27	0.779868	4734.79
CP466722	GAK	1	0.977554	0.983874	0.926873	0.844001	0.59137	0.499658	0.240922	0.134033	-	5671500000	Normalized.LFQ.intensity.	0.73847	0.00650436	1.00861	221.951	221.951	0.602982	133.833
CP466722	INCENP	1	0.818964	0.940593	0.756865	0.940063	0.669672	0.626709	0.390501	0.359456	-	40672000	Normalized.LFQ.intensity.	0.827462	0.255215	0.913062	299.237	299.237	0.58962	176.436
CP466722	IRAK3	1	0.958652	0.996977	0.938645	1.10042	0.940779	0.939534	0.754105	0.596894	-	653340000	Normalized.LFQ.intensity.	1.61942	0.534462	0.992636	956.276	956.276	0.448604	428.989
CP466722	MTOR	1	0.884712	0.973123	1.10866	1.07879	0.849508	0.82995	0.618399	0.501363	-	1162900000	Normalized.LFQ.intensity.	1.19394	0.444642	1.00179	508.065	508.065	0.23878	121.316
CP466722	NEK9	1	0.984874	0.963197	0.915543	0.926339	0.603025	0.485956	0.165362	0.0398279	-	12235000000	Normalized.LFQ.intensity.	0.850342	-0.0934564	0.995975	283.389	283.389	0.507597	143.847
CP466722	NLK	1	1.0439	1.21114	0.990528	1.17436	0.906825	0.90292	0.76578	0.557019	-	94166000	Normalized.LFQ.intensity.	0.779587	0.240056	1.08062	1659.62	1659.62	0.711866	1181.43
CP466722	PDGFRB	1	0.871433	1.07976	1.02338	1.05258	0.845859	0.78064	0.552762	0.536727	-	101000000	Normalized.LFQ.intensity.	1.40157	0.507675	1.00285	279.991	279.991	1.04963	279.991
CP466722	PI4KB	1	0.8994	0.946832	0.880225	0.987199	0.821533	0.65167	0.336926	0.146125	-	330350000	Normalized.LFQ.intensity.	1.22043	0.0502502	0.94592	534.309	534.309	0.657614	351.369
CP466722	PIK3C2B	1	0.948447	1.05369	1.16666	1.02322	0.969805	1.00499	0.770678	0.530527	-	89944000	Normalized.LFQ.intensity.	2.10451	0.474365	1.02949	1066.77	1066.77	0.550536	587.293
CP466722	PLK4	1	0.844033	1.09819	1.06238	1.02177	0.862639	0.802514	0.582584	0.514929	-	57004000	Normalized.LFQ.intensity.	1.25213	0.475818	1.00405	369.835	369.835	0.553744	204.794
CP466722	Q6ZSR9	1	1.00425	0.90175	0.870582	1.02331	0.855564	0.883686	0.695119	0.52463	-	250710000	Normalized.LFQ.intensity.	0.830841	0.100985	0.960451	2868.59	2868.59	0.842034	2415.46
CP466722	ZAK	1	1.0013	1.07852	0.864467	1.01962	0.914354	0.873774	0.662488	0.471074	-	402180000	Normalized.LFQ.intensity.	0.888768	0.14246	0.998567	1737.93	1737.93	0.751656	1306.33
Gedatolisib	MET	1	1.3653	0.705113	1.23203	1.36262	0.711468	0.634948	0.882177	0	0	51985000	Normalized.LFQ.intensity.	0.894692	-0.179757	1.09413	1253.61	1253.61	0.876384	1098.65
Gedatolisib	MLST8	1	1.43174	0.799317	1.0184	0.662716	0.802362	0.506318	0.687533	0	0.323217	103500000	Normalized.LFQ.intensity.	0.481668	0.0224005	1.1244	309.602	309.602	0.204991	63.4656
Gedatolisib	MTOR	1	1.48028	0.783334	1.15697	1.08996	0.92699	0.649033	0.641534	0.25264	0.260549	2089900000	Normalized.LFQ.intensity.	0.804162	0.152063	1.12675	518.269	518.269	0.23878	123.752
Gedatolisib	PIK3C2A	1	1.41003	0.815644	1.26783	1.22004	0.911252	0.717014	0.72269	0.194202	0.20651	339140000	Normalized.LFQ.intensity.	0.867109	0.0554151	1.14153	818.444	818.444	0.73446	601.115
Gedatolisib	PIK3C2B	1	1.61009	0.728583	1.13093	0.966407	0.692632	0	0	0	0	17308000	Normalized.LFQ.intensity.	3.66166	-0.00205094	1.08968	115.599	115.599	0.550536	63.6414
Gedatolisib	PIK3CA	1	2.06544	1.16794	1.37727	1.37763	1.35155	1.12176	1.17438	0.327603	0.464203	193770000	Normalized.LFQ.intensity.	5.95443	0.393675	1.35196	1276.46	1276.46	0.126141	161.014
Gedatolisib	PIK3CG	1	1.62208	1.01042	1.45565	1.43551	1.17703	0.960159	1.02049	0.286104	0.569311	586740000	Normalized.LFQ.intensity.	1.32315	0.407314	1.28501	845.572	845.572	0.579633	490.121
Gedatolisib	PIK3R1	1	2.06864	1.15344	1.33441	1.38779	1.44032	1.19581	1.19366	0.456473	0.600974	118100000	Normalized.LFQ.intensity.	6.37266	0.527717	1.36914	1227.53	1227.53	0.223955	274.912
Gedatolisib	PIK3R2	1	1.95316	1.26245	1.59806	1.46528	1.46599	1.17525	1.02876	0.483153	0.595389	51632000	Normalized.LFQ.intensity.	1.47315	0.49762	1.45655	827.752	827.752	0.210273	174.054
Gedatolisib	PRKDC	1	1.36047	0.760317	1.15085	1.09869	0.937939	0.788335	0.988319	0.439453	0.633474	32614000000	Normalized.LFQ.intensity.	0.789952	0.489368	1.07627	824.748	824.748	0.487244	401.853
KU60019	ATM	1	0.982051	0.867303	0.726169	0.599281	0.501022	0.265825	0.184301	0.136657	0.0735589	781200000	Normalized.LFQ.intensity.	0.596212	0.0388123	1.01853	55.2992	55.2992	0.0788142	4.35836
KU60019	ATR	1	0.897817	0.936563	1.03044	0.845764	0.997586	0.983199	0.797421	0.591407	0.651743	44228000	Normalized.LFQ.intensity.	7.75793	0.621547	0.955913	1013.47	1013.47	0.248737	252.089
KU60019	PRKDC	1	0.946146	0.885591	0.639245	0.957875	0.926041	0.618438	0.332017	0.285551	0.202952	15872000000	Normalized.LFQ.intensity.	2.4576	0.254499	0.895359	352.866	352.866	0.487244	171.932
NVP-BEZ235	ATM	1	1.03571	0.938256	1.14582	1.06382	0.818772	0.338382	0.227434	0.0940675	0.170477	968600000	Normalized.LFQ.intensity.	2.26297	0.1574	1.03928	166.086	166.086	0.0788142	13.0899
NVP-BEZ235	ATR	1	2.16612	1.12274	0.927015	0.819797	0.468455	0	0	0	0.155045	73565000	Normalized.LFQ.intensity.	1.03843	0.0209692	1.45299	30.3927	30.3927	0.248737	7.5598
NVP-BEZ235	BCR	1	1.10993	0.913696	1.09493	1.01493	1.16742	0.496886	0.523554	0.469573	0.815543	440230000	Normalized.LFQ.intensity.	16.7152	0.576379	1.05016	175.272	175.272	0.592808	103.903
NVP-BEZ235	DYNC1H1	1	1.66643	0.699582	1.92699	1.60344	0.727957	0.0146315	0.0179818	0.0115017	0.164434	533660000	Normalized.LFQ.intensity.	7.29457	0.0525393	1.37932	100.515	100.515	1.1335	100.515
NVP-BEZ235	FECH	1	0.941142	0.800064	0.993332	0.967701	0.937816	0.994675	0.863751	0.688631	0.417877	892200000	Normalized.LFQ.intensity.	1.69356	0.324813	0.947069	3606.56	3606.56	1.01412	3606.56
NVP-BEZ235	FLNA	1	1.25077	1.08904	1.02197	1.03586	1.01556	0	0	0	0.190305	176840000	Normalized.LFQ.intensity.	7.93055	0.0048734	1.07985	141.718	141.718	0.938854	133.053
NVP-BEZ235	FLNB	1	1.21334	1.53682	0.884894	0.831056	0.921902	0	0.191498	0	0.475649	25809000	Normalized.LFQ.intensity.	10.9674	0.16558	1.09322	114.497	114.497	0.694138	79.4769
NVP-BEZ235	FLNC	1	1.64273	1.15117	1.09447	1.47062	0.994938	0.160839	0	0	0.474533	260400000	Normalized.LFQ.intensity.	8.43193	0.158802	1.27179	114.007	114.007	0.943019	107.511
NVP-BEZ235	MAP4K2	1	1.07161	0.891184	1.00217	1.04225	0.901049	0.974136	1.0094	0.805126	0.49795	206680000	Normalized.LFQ.intensity.	7.33258	0.497817	0.986481	3223.78	3223.78	1.05061	3223.78
NVP-BEZ235	MLST8	1	1.43664	1.0215	1.23276	1.31376	0.684822	0.699839	0.639769	0.555151	0.270031	88581000	Normalized.LFQ.intensity.	9.01427	0.541187	1.20094	86.7759	86.7759	0.204991	17.7883
NVP-BEZ235	MTOR	1	1.09531	0.905052	1.14987	0.997531	0.793908	0.24259	0.228863	0.15953	0.231305	1218900000	Normalized.LFQ.intensity.	3.4985	0.205188	1.03078	129.378	129.378	0.23878	30.8929
NVP-BEZ235	NUAK1	1	0.776978	0.657045	0.911944	0.912909	0.939434	1.03904	0.602357	0.369188	0.255966	70795000	Normalized.LFQ.intensity.	5.26683	0.312234	0.891255	1003.07	1003.07	0.770075	772.442
NVP-BEZ235	PIK3C2A	1	1.12188	0.87225	0.959631	1.03994	1.00319	0.988959	0.798154	0.52844	0.269827	201570000	Normalized.LFQ.intensity.	1.44497	0.183815	1.00349	2327.09	2327.09	0.73446	1709.15
NVP-BEZ235	PIK3C2B	1	0.694964	0.72454	0.867713	1.15931	0.902787	0.895537	0.366476	0.21898	0.157674	119240000	Normalized.LFQ.intensity.	4.82776	0.187776	0.892943	800.708	800.708	0.550536	440.819
NVP-BEZ235	PIK3C3	1	0.951915	0.735689	0.985363	0.85772	1.13653	1.02501	0.53823	0.519822	0.449243	31539000	Normalized.LFQ.intensity.	8.92726	0.484484	0.95604	794.982	794.982	0.832776	662.042
NVP-BEZ235	PIK3CA	1	1.09748	1.10571	1.17078	1.27049	1.31002	1.28849	0.82868	0.613882	0.293545	521320000	Normalized.LFQ.intensity.	1.63582	0.263361	1.17526	1869.95	1869.95	0.126141	235.877
NVP-BEZ235	PIK3CD	1	0.935787	0.957248	0.817701	1.02742	0.974832	1.11549	0.716759	0.604368	0.497793	127850000	Normalized.LFQ.intensity.	8.56324	0.551058	0.975497	949.337	949.337	0.444611	422.086
NVP-BEZ235	PIK3R1	1	1.15778	1.05804	1.22262	1.23484	1.08547	1.37859	0.815507	0.611523	0.388491	335490000	Normalized.LFQ.intensity.	5.07052	0.497821	1.16246	986.583	986.583	0.223955	220.951
NVP-BEZ235	PIK3R2	1	1.28339	1.1578	1.46611	1.53535	1.47149	1.60045	0.886902	0.618608	0.357205	139830000	Normalized.LFQ.intensity.	5.50987	0.486448	1.35925	972.522	972.522	0.210273	204.495
NVP-BEZ235	PRKDC	1	1.04484	0.737875	1.00569	0.68203	0.399522	0.0943492	0.0836073	0.0759811	0.158088	14403000000	Normalized.LFQ.intensity.	1.57674	0.0918287	0.953903	58.8314	58.8314	0.487244	28.6653
Omipalisib	ATM	1	1.98203	1.72713	1.56214	1.36562	1.33276	0.803863	1.13123	0.698143	0.452201	1100300000	Normalized.LFQ.intensity.	0.694352	0.393526	1.56414	572.253	572.253	0.0788142	45.1017
Omipalisib	ATR	1	2.12181	1.78311	1.73628	1.03596	0.915389	0.94535	0.992264	0.687504	0.629929	89955000	Normalized.LFQ.intensity.	8.48828	0.834105	1.66043	26.2649	26.2649	0.248737	6.53305
Omipalisib	MLST8	1	0.530992	1.18886	1.73181	1.20934	0.926959	0.573076	0.429042	0.314811	0	118530000	Normalized.LFQ.intensity.	1.22856	0.115357	1.12741	375.559	375.559	0.204991	76.9863
Omipalisib	MTOR	1	1.90506	1.64643	1.49911	1.06733	0.88567	0.821412	0.704008	0.519656	0.491812	1527000000	Normalized.LFQ.intensity.	1.16403	0.583378	1.52708	53.8405	53.8405	0.23878	12.856
Omipalisib	PI4KA	1	1.50873	1.24285	1.10859	0.567316	0.307166	0.2958	0.185077	0.17262	0.166203	1278600000	Normalized.LFQ.intensity.	2.0686	0.2125	1.2584	22.6274	22.6274	0.669467	15.1483
Omipalisib	PI4KB	1	1.18771	1.19231	0.823656	0.438769	0.223736	0.0740236	0	0	0	503020000	Normalized.LFQ.intensity.	1.36964	0.0195547	1.13969	22.6162	22.6162	0.657614	14.8728
Omipalisib	PIK3C2A	1	1.69634	1.49983	0.970611	0.48351	0.075682	0.0767591	0	0	0	239030000	Normalized.LFQ.intensity.	1.77248	0.0179476	1.39799	18.8494	18.8494	0.73446	13.8441
Omipalisib	PIK3C2B	1	2.39511	1.34318	1.28462	0.448631	0.0778821	0.0627489	0	0	0	112950000	Normalized.LFQ.intensity.	2.02523	0.0156018	1.60068	18.8397	18.8397	0.550536	10.3719
Omipalisib	PIK3CA	1	0.449694	0.217822	0.0267069	0	0	0	0	0.0208619	0	738410000	Normalized.LFQ.intensity.	1.14854	-0.00212309	0.998993	0.870088	0.870088	0.126141	0.109754
Omipalisib	PIK3CD	1	0.772479	0.376156	0.309131	0.187821	0.142742	0.18796	0.168301	0.231407	0.302864	113930000	Normalized.LFQ.intensity.	1.81364	0.211694	1.00352	1.57744	1.57744	0.444611	0.701345
Omipalisib	PIK3CG	1	1.23749	1.12735	0.723355	0.267557	0.0621028	0	0	0	0	1539400000	Normalized.LFQ.intensity.	1.80777	0.00615134	1.13816	14.548	14.548	0.579633	8.43252
Omipalisib	PIK3R1	1	0.430653	0.0624062	0.0234108	0.0424844	0.0361093	0.0211795	0.0234828	0.0202906	0.0163669	360570000	Normalized.LFQ.intensity.	2.65268	0.0259914	0.999997	0.879249	0.879249	0.223955	0.196913
Omipalisib	PIK3R2	1	0.617398	0.0605925	0.0149822	0	0.010985	0.0118578	0.0100721	0	0	225950000	Normalized.LFQ.intensity.	3.01786	0.00656386	1.00002	1.16759	1.16759	0.210273	0.245513
Omipalisib	PRKDC	1	3.83261	2.98555	2.03895	1.17414	1.08508	1.38835	1.38506	1.00658	1.46252	11417000000	Normalized.LFQ.intensity.	6.93346	1.25015	2.60607	10.4876	10.4876	0.487244	5.11
PF-04691502	MLST8	1	1.48679	1.4624	2.19234	1.30041	1.01619	2.47661	1.00412	0.571954	0.435029	83466000	Normalized.LFQ.intensity.	5.81562	0.504011	1.56234	979.74	979.74	0.204991	200.838
PF-04691502	MTOR	1	1.23977	1.70008	1.55237	0.925049	0.831202	1.50714	0.98819	0.474657	0.455364	1959200000	Normalized.LFQ.intensity.	6.55466	0.464672	1.25085	1110.5	1110.5	0.23878	265.164
PF-04691502	PI4KA	1	1.28295	1.52943	1.35177	0.76522	0.546111	0.746371	0.386091	0.180155	0.151072	1565000000	Normalized.LFQ.intensity.	0.831313	0.186389	1.29191	96.9044	96.9044	0.669467	64.8743
PF-04691502	PI4KB	1	1.12094	1.53299	1.43089	0.855873	0.724168	1.42325	0.998062	0.466545	0.287816	782490000	Normalized.LFQ.intensity.	2.85042	0.287211	1.15343	1825.59	1825.59	0.657614	1200.53
PF-04691502	PIK3C2A	1	1.34519	1.61197	1.34936	0.852512	0.71456	1.28402	0.84634	0.376991	0.233885	410930000	Normalized.LFQ.intensity.	0.562184	-0.563831	1.25566	5682.71	5682.71	0.73446	4173.72
PF-04691502	PIK3C2B	1	1.24005	1.63158	0.813088	0.583616	0.428223	0	0	0	0	15277000	Normalized.LFQ.intensity.	1.1862	-0.00171234	1.26152	31.5084	31.5084	0.550536	17.3465
PF-04691502	PIK3CA	1	0.989345	1.22241	0.854203	0.284171	0.124974	0.111938	0	0	0	298540000	Normalized.LFQ.intensity.	2.37412	0.0421018	1.0699	18.3543	18.3543	0.126141	2.31523
PF-04691502	PIK3CG	1	1.21026	1.16746	0.694247	0.117565	0.0155125	0.0122669	0	0.00912991	0	559450000	Normalized.LFQ.intensity.	2.73572	0.0102605	1.13207	11.9797	11.9797	0.579633	6.94385
PF-04691502	PIK3R1	1	1.49931	1.59361	1.0691	0.525162	0.287061	0.398353	0.360429	0.232062	0	154820000	Normalized.LFQ.intensity.	2.28869	0.250919	1.35784	17.6428	17.6428	0.223955	3.9512
PF-04691502	PIK3R2	1	1.42116	1.39325	1.02514	0.370631	0	0	0	0	0	65498000	Normalized.LFQ.intensity.	2.33155	-0.00145635	1.2685	19.9961	19.9961	0.210273	4.20463
PF-04691502	PRKDC	1	1.24129	1.54347	1.39096	0.847375	0.722025	1.27502	0.885709	0.473267	0.504801	30744000000	Normalized.LFQ.intensity.	0.581862	0.144683	1.22558	2120.71	2120.71	0.487244	1033.3
PF-04691502	TTC7B	1	1.0827	1.40775	1.35922	0.755389	0.354354	0.50234	0	0	0	40631000	Normalized.LFQ.intensity.	1.18277	0.0311627	1.21404	68.5099	68.5099	0.948785	65.0012
VE-822	AAK1	1	0.927763	0.882232	0.871354	0.992705	0.663859	0.499061	0.643981	0.176338	0.218579	774860000	Normalized.LFQ.intensity.	0.555016	-0.00848896	0.973841	787.567	787.567	0.74435	586.226
VE-822	ACAD11	1	1.2375	1.19338	1.1275	1.068	0.870311	0.572792	0.372614	0	0	26898000	Normalized.LFQ.intensity.	0.939665	-0.0807185	1.15172	396.431	396.431	1.27998	396.431
VE-822	ACVR1	1	0.887554	1.18709	0.942213	1.07934	0.791814	0.604976	0.366791	0.158741	0.0938225	177320000	Normalized.LFQ.intensity.	1.04292	0.0655945	1.02702	401.396	401.396	0.564794	226.706
VE-822	ATM	1	0.772143	0.618875	0.586615	0.683303	0.382718	0.164103	0.436299	0.0305479	0.250689	732030000	Normalized.LFQ.intensity.	0.362447	0.0704842	0.991455	22.8787	22.8787	0.0788142	1.80316
VE-822	ATR	1	0.781013	0.4525	0.285063	0	0	0	0	0	0	56331000	Normalized.LFQ.intensity.	1.09397	-0.00201139	1.00167	2.94009	2.94009	0.248737	0.731309
VE-822	BMP2K	1	0.954173	1.04555	0.972921	1.10432	0.917856	0.804628	0.815614	0.437104	0.348775	707320000	Normalized.LFQ.intensity.	0.969171	0.201099	1.00658	1779.57	1779.57	0.767354	1365.56
VE-822	BMPR1A	1	1.0062	1.1255	0.961882	1.23605	1.25841	0.982306	0.656312	0.477869	0.338146	141400000	Normalized.LFQ.intensity.	1.96551	0.372492	1.09524	832.782	832.782	0.58147	484.238
VE-822	BMPR1B	1	0.891378	0.844575	0.905119	0.713034	0.755756	0.842474	0.449159	0	0.336662	49296000	Normalized.LFQ.intensity.	10.5513	0.169548	0.850334	966.363	966.363	0.651143	629.241
VE-822	BUB1	1	0.930863	1.03241	0.956224	1.04095	0.744024	0.912748	0.882142	0.412154	0	77821000	Normalized.LFQ.intensity.	2.80888	-0.00119925	0.944623	2721.48	2721.48	0.83051	2260.21
VE-822	CSNK2A1;CSNK2A3	1	1.02132	1.20991	0.998552	1.23944	1.30638	1.33631	1.07314	0.90498	0.49325	1014900000	Normalized.LFQ.intensity.	2.1903	0.402132	1.15332	4068.22	4068.22	1.32012	4068.22
VE-822	CSNK2A2	1	0.966035	1.16415	0.988818	1.32458	1.44848	1.42247	1.09484	0.764516	0.357663	1532900000	Normalized.LFQ.intensity.	2.42357	0.31156	1.1838	3069.61	3069.61	1.69282	3069.61
VE-822	CSNK2B	1	1.01147	1.01402	0.799863	1.21102	1.11761	1.14848	0.906309	0.787647	0.37766	931440000	Normalized.LFQ.intensity.	1.61242	0.176367	1.03737	4870.14	4870.14	1.63707	4870.14
VE-822	EIF3J	1	1.07369	1.41954	1.13545	1.26681	1.52745	1.40563	1.09718	0.916503	0.489702	536180000	Normalized.LFQ.intensity.	1.77977	0.365774	1.25419	3708.91	3708.91	1.35202	3708.91
VE-822	FLT4	1	0.899587	1.05569	0.963949	0.832375	0.981962	0.90519	0	0	0	28896000	Normalized.LFQ.intensity.	8.35128	-0.000615793	0.955594	423.978	423.978	0.696392	295.255
VE-822	GSK3A	1	0.902201	0.866614	0.878154	0.907702	0.899471	0.795139	0.572184	0.305519	0.100101	3885400000	Normalized.LFQ.intensity.	1.14007	0.00189109	0.916682	1590.28	1590.28	0.556077	884.318
VE-822	GSK3B	1	0.895362	0.995254	0.945411	1.07458	1.07875	0.911478	0.640486	0.403945	0.165082	5688300000	Normalized.LFQ.intensity.	1.38292	0.123734	0.999189	1492.15	1492.15	0.651714	972.457
VE-822	MAP3K1	1	0.853986	0.866687	0.879241	0.828332	0.468248	0.369398	0.490975	0.181799	0.244392	889220000	Normalized.LFQ.intensity.	1.94596	0.309215	0.908112	66.1631	66.1631	0.633558	41.9182
VE-822	MAP4K4	1	0.824201	0.86021	0.871369	0.737082	0.582844	0.460704	0.576122	0.231246	0.428606	83641000	Normalized.LFQ.intensity.	0.585171	0.325804	0.956988	71.0948	71.0948	1.24145	71.0948
VE-822	MYLK3	1	0.894038	0.837176	0.984284	0.975882	0.769819	0.678316	0.659195	0.692078	0.370255	26923000	Normalized.LFQ.intensity.	0.396028	-0.191324	0.964758	14916	14916	0.703649	10495.6
VE-822	PI4KA	1	0.89494	0.866007	0.904595	0.895718	0.469034	0.184215	0.628133	0.0482701	0.3036	829100000	Normalized.LFQ.intensity.	7.71884	0.291062	0.912285	88.8452	88.8452	0.669467	59.4789
VE-822	PI4KB	1	0.933263	0.98782	0.958027	1.06225	1.08239	1.03549	0.903875	0.81552	0.43169	299680000	Normalized.LFQ.intensity.	1.26253	-0.175396	1.0061	10477	10477	0.657614	6889.81
VE-822	PIK3C3	1	0.923898	1.08183	1.14368	0.600685	0.542267	0.697413	0.420183	0.502927	0.383785	35749000	Normalized.LFQ.intensity.	9.22613	0.509294	1.0374	25.3259	25.3259	0.832776	21.0908
VE-822	PIP4K2C	1	0.646592	1.07158	0.90546	0.851021	0.82438	0.543612	0.416874	0.202066	0	51112000	Normalized.LFQ.intensity.	0.831383	-0.0824596	0.91498	860.623	860.623	1.00399	860.623
VE-822	STK11	1	1.22471	1.21706	1.11857	1.27455	1.2357	1.08422	0.954023	0.873127	0.327312	37509000	Normalized.LFQ.intensity.	1.05064	-0.502614	1.16912	10200.7	10200.7	0.656142	6693.11
VE-822	STK4	1	0.977139	1.30283	1.08604	1.22285	1.42335	1.32171	1.05922	0.959295	0.645445	726720000	Normalized.LFQ.intensity.	1.74918	0.550264	1.18412	3867.6	3867.6	0.804086	3109.88
Voxtalisib	ACAD11	1	1.18463	1.28742	1.58881	1.20523	0.967345	1.23603	0.926131	0	0.861341	81775000	Normalized.LFQ.intensity.	0.609006	-8.69612e-05	1.27011	2777.45	2777.45	1.27998	2777.45
Voxtalisib	CSNK1D	1	1.11594	1.09704	1.44318	1.30286	1.11011	1.05007	0.543451	0.291339	0.538842	184090000	Normalized.LFQ.intensity.	2.72557	0.417678	1.18189	524.895	524.895	0.946043	496.573
Voxtalisib	CSNK1E	1	1.04329	0.937422	1.24122	0.941712	1.06632	0.863253	0.426787	0.334004	0.587571	843850000	Normalized.LFQ.intensity.	8.31373	0.449435	1.03833	332.701	332.701	0.745331	247.973
Voxtalisib	NQO2	1	1.03307	1.19557	1.4788	1.03956	1.1415	0.994934	0.716205	0.404428	0.701292	1651400000	Normalized.LFQ.intensity.	2.16517	0.561924	1.14956	518.395	518.395	1.41791	518.395
Voxtalisib	PI4KA	1	1.06159	1.16298	1.54354	1.33398	1.15754	1.04309	0.701475	0.335999	0.702316	1513500000	Normalized.LFQ.intensity.	2.22566	0.529887	1.21223	517.289	517.289	0.669467	346.308
Voxtalisib	PI4KB	1	1.04102	1.20617	1.50635	1.22305	1.10979	0.73651	0.305124	0.0457209	0.0559328	729930000	Normalized.LFQ.intensity.	1.62823	0.0386661	1.19869	416.295	416.295	0.657614	273.762
Voxtalisib	PIK3C2A	1	1.19118	1.31015	2.51934	1.24579	0.707312	0.303856	0.0662021	0	0	322770000	Normalized.LFQ.intensity.	2.03688	0.0460726	1.4771	98.8696	98.8696	0.73446	72.6158
Voxtalisib	PIK3C2B	1	1.24513	1.5527	2.16679	1.29958	1.17577	1.05719	0.69759	0	0	35459000	Normalized.LFQ.intensity.	1.33201	-0.0159	1.43068	720.551	720.551	0.550536	396.689
Voxtalisib	PIK3CA	1	0.958905	1.20388	1.51629	1.10394	1.21785	0.917512	0.339386	0.0954365	0.118453	309420000	Normalized.LFQ.intensity.	2.18439	0.0986773	1.16866	544.772	544.772	0.126141	68.7179
Voxtalisib	PIK3CD	1	1.10451	1.02964	1.81484	1.18249	1.26666	0.600791	1.22292	0.580308	0	37008000	Normalized.LFQ.intensity.	5.217	-0.0013546	1.15301	3014.8	3014.8	0.444611	1340.41
Voxtalisib	PIK3CG	1	1.04759	1.05294	1.03301	0.243916	0.0471047	0.0183336	0	0.0192055	0	516150000	Normalized.LFQ.intensity.	6.695	0.0169365	1.03395	24.9018	24.9018	0.579633	14.4339
Voxtalisib	PIK3R1	1	1.47038	1.57669	2.08817	2.09069	1.49587	0.809582	0.269011	0.131417	0.140211	162380000	Normalized.LFQ.intensity.	2.47674	0.157566	1.64	274.471	274.471	0.223955	61.4693
Voxtalisib	PIK3R2	1	1.09563	1.41378	1.85359	1.34987	1.33798	0.978757	0.52826	0	0.404951	73556000	Normalized.LFQ.intensity.	1.52896	0.0302916	1.35099	639.842	639.842	0.210273	134.541
Voxtalisib	PIP4K2C	1	1.47085	1.09333	1.273	1.06614	1.07068	1.02724	0.662822	0.498663	0	41834000	Normalized.LFQ.intensity.	1.05621	-0.00826317	1.181	1505.59	1505.59	1.00399	1505.59
Voxtalisib	PRKDC	1	1.04866	1.08161	1.44768	1.35537	1.09235	0.935756	0.63403	0.282103	0.56052	27912000000	Normalized.LFQ.intensity.	1.86444	0.431067	1.17786	468.448	468.448	0.487244	228.248
Voxtalisib	TTC7B	1	0.852806	1.43601	1.56145	1.0598	1.24876	0.879883	0.682682	0.190856	0.496832	39402000	Normalized.LFQ.intensity.	1.68602	0.356296	1.19433	533.41	533.41	0.948785	506.091
VS5584	EGFR	1	0.966155	1.04614	1.13414	1.20976	1.22966	1.2069	1.35267	0.754519	0.637622	535330000	Normalized.LFQ.intensity.	6.13862	0.635654	1.14322	2488.34	2488.34	0.619816	1542.31
VS5584	JAK1	1	0.772073	1.11479	1.1816	1.14168	1.09886	0.802788	0.845619	0.410046	0.53411	1314400000	Normalized.LFQ.intensity.	1.46201	0.451088	1.04233	903.682	903.682	0.366286	331.006
VS5584	MTOR	1	0.869659	1.32818	1.58172	1.71078	1.76569	1.4384	1.41972	0.595487	0.57923	1625300000	Normalized.LFQ.intensity.	8.29559	0.577203	1.38969	1931.24	1931.24	0.23878	461.14
VS5584	NEK2	1	0.610678	1.19664	1.57771	1.40592	1.54554	0.905172	1.01337	0.343809	0.363336	52622000	Normalized.LFQ.intensity.	4.4858	0.343442	1.17815	1353.85	1353.85	0.615933	833.877
VS5584	PAK4	1	0.793787	1.09734	1.16815	1.24197	1.25461	1.00904	1.12961	0.451665	0.484684	3298300000	Normalized.LFQ.intensity.	9.85198	0.466218	1.08701	1806.92	1806.92	0.692029	1250.44
VS5584	PIK3CA	1	0.661359	1.32878	1.37452	1.19976	0.939975	0.472124	0.219792	0	0	278290000	Normalized.LFQ.intensity.	1.65522	-0.00130234	1.11394	281.687	281.687	0.126141	35.5322
VS5584	PIK3CD	1	1.16804	1.64344	1.42105	1.26148	1.51587	1.34591	0	0	0	25528000	Normalized.LFQ.intensity.	9.28728	-0.00170435	1.33707	564.223	564.223	0.444611	250.86
VS5584	PIK3CG	1	0.677892	1.26283	1.37498	1.28319	1.18882	0.730715	0.540322	0.148344	0.10938	602770000	Normalized.LFQ.intensity.	1.42157	0.0816039	1.13012	658.071	658.071	0.579633	381.439
VS5584	PIK3R1	1	0.863904	1.45872	1.52908	1.40492	0.762694	0.399295	0.243344	0.143207	0	94215000	Normalized.LFQ.intensity.	1.96006	0.12824	1.25058	138.906	138.906	0.223955	31.1087
VS5584	PIK3R2	1	0.626508	2.32655	1.75685	1.63541	1.13938	0.34622	0.294051	0.158036	0.189569	58925000	Normalized.LFQ.intensity.	3.10183	0.216944	1.46877	142.396	142.396	0.210273	29.9419

## Sheet: S3E_CATDStarget
Drug	Target	apparent Kd [nM]	CATDS
VS5584	PIK3CA	35.5322	0.877215
VS5584	PIK3CD	250.86	0.224375
VS5584	JAK1	331.006	0.170622
BGT226	PIK3CG	58.1627	0.0626009
VS5584	MTOR	461.14	0.133889
VS5584	NEK2	833.877	0.0985293
VS5584	PAK4	1250.44	0.0794643
VS5584	EGFR	1542.31	0.0703234
Apitolisib	JAK1	8.25537	0.404984
Apitolisib	PIK3CA	8.4989	0.397048
Omipalisib	PIK3CG	8.43252	0.0806261
Apitolisib	PIK3CD	133.232	0.114118
Apitolisib	MTOR	278.112	0.0862512
Apitolisib	FER	598.598	0.0665951
Apitolisib	TEC	603.308	0.0664323
Apitolisib	BTK	952.934	0.0579049
Apitolisib	HCK	1074.12	0.0558947
Apitolisib	EGFR	1519.18	0.0500555
Apitolisib	NEK2	1530.43	0.0499277
Apitolisib	FLT3	1825.69	0.0469161
Apitolisib	STK10	2697.9	0.0418757
Apitolisib	SLK	2718.08	0.0418056
Apitolisib	PRKCA	2974.88	0.0410132
Apitolisib	RIOK2	3400.72	0.0399911
CH5132799	PIK3CB	6.35102	0.286192
CH5132799	PIK3CA	6.71298	0.259019
CH5132799	JAK1	20.1027	0.169049
Gedatolisib	PIK3CG	490.121	0.109372
CH5132799	PIK3CD	84.6043	0.126681
CH5132799	PRKDC	2151.66	0.0916538
CH5132799	RIOK2	26233.6	0.0799983
Gedatolisib	PIK3C2B	63.6414	0.377991
Gedatolisib	MTOR	123.752	0.213592
Gedatolisib	PIK3CA	161.014	0.170779
Gedatolisib	PRKDC	401.853	0.114878
Apitolisib	PIK3CG	102.347	0.126748
Gedatolisib	PIK3C2A	601.115	0.104286
Gedatolisib	MET	1098.65	0.0923617
PF-04691502	PIK3CA	2.31523	0.682456
CH5132799	PIK3CG	29.6615	0.154633
PF-04691502	PIK3C2B	17.3465	0.178876
PF-04691502	PI4KA	64.8743	0.139701
PF-04691502	MTOR	265.164	0.105806
PF-04691502	PRKDC	1033.3	0.081846
PF-04691502	PI4KB	1200.53	0.0797994
PF-04691502	PIK3C2A	4173.72	0.0700986
VE-822	ATR	0.731309	0.481395
VE-822	ATM	1.80316	0.350498
VE-822	PIK3C3	21.0908	0.158231
VE-822	MAP3K1	41.9182	0.112616
VE-822	PI4KA	59.4789	0.0939715
VE-822	MAP4K4	71.0948	0.085406
VE-822	ACVR1	226.706	0.0638574
VE-822	ACAD11	396.431	0.0555039
VE-822	BMPR1A	484.238	0.0526796
VE-822	AAK1	586.226	0.0501168
VE-822	PIP4K2C	860.623	0.0454051
VE-822	GSK3A	884.318	0.0450919
VE-822	GSK3B	972.457	0.0440134
VE-822	BMP2K	1365.56	0.0403214
VE-822	BUB1	2260.21	0.0351848
VE-822	CSNK2A2	3069.61	0.0324674
VE-822	STK4	3109.88	0.0323625
VE-822	CSNK2A1;CSNK2A3	4068.22	0.0304263
VE-822	STK11	6693.11	0.0279236
VE-822	PI4KB	6889.81	0.027815
VE-822	MYLK3	10495.6	0.0265721
AZD6738	ATM	0.455894	0.40191
AZD6738	PRKDC	0.6361	0.33625
AZD6738	ATR	0.787022	0.30396
AZD6738	PIK3CA	669.614	0.142086
AZD6738	PIK3CD	1514.41	0.106609
AZD6738	PI4KB	2279.16	0.0930147
BGT226	ATM	0.559879	0.833483
BGT226	MTOR	2.52522	0.252755
BGT226	ATR	4.26821	0.173286
BGT226	PIK3CA	7.62144	0.120213
BGT226	PRKDC	8.06154	0.116716
BGT226	PIK3CD	22.8997	0.0793133
VS5584	PIK3CG	381.439	0.155605
BGT226	PIK3C3	67.4441	0.0604639
BGT226	CLK1	238	0.0467844
BGT226	PI4KA	319.418	0.0443156
BGT226	CLK2	361.694	0.0433118
BGT226	PIK3C2B	577.101	0.0397157
BGT226	PI4KB	675.949	0.0385576
BGT226	DYRK1A	924.233	0.0363442
BGT226	PIK3C2A	1067.7	0.0353532
BGT226	IRAK3	1961.5	0.0312802
BGT226	FECH	2547.51	0.0295501
BGT226	PDGFRB	2619.63	0.0293676
BGT226	FLT3	3040.52	0.0284108
BGT226	PIP4K2C	3185.41	0.0281198
BGT226	GSK3A	3409.55	0.0277037
BGT226	CSNK2A2	4227.97	0.0264778
BGT226	CSNK2A1;CSNK2A3	4872.76	0.0257607
BGT226	TP53RK	22053.5	0.0221507
CP466722	ACVR1	32.7354	0.205178
CP466722	ATM	51.4446	0.139452
CP466722	CLK1	94.6362	0.0908759
CP466722	MTOR	121.316	0.0786715
CP466722	GAK	133.833	0.0744704
CP466722	NEK9	143.847	0.0715467
CP466722	PLK4	204.794	0.0580396
CP466722	ATR	238.041	0.052256
CP466722	CLK2	258.08	0.0494581
CP466722	PDGFRB	279.991	0.0470356
CP466722	PI4KB	351.369	0.0419643
CP466722	AURKB	420.968	0.0388474
CP466722	IRAK3	428.989	0.0385494
CP466722	PIK3C2B	587.293	0.0341932
CP466722	AAK1	605.651	0.0338226
CP466722	AXL	662.991	0.032787
CP466722	CSNK2A2	866.26	0.0301618
CP466722	CSNK2A1;CSNK2A3	884.311	0.0299844
CP466722	NLK	1181.43	0.027819
CP466722	CDKL5	1266.25	0.027382
CP466722	ZAK	1306.33	0.0271947
CP466722	Q6ZSR9	2415.46	0.0244116
CP466722	CSNK1D	2702.01	0.024048
CP466722	ERN1	4734.79	0.02265
CP466722	DYRK1A	9296.52	0.0215718
CP466722	BUB1	12988.7	0.0211869
KU60019	ATM	4.35836	0.999761
KU60019	PRKDC	171.932	0.345232
KU60019	ATR	252.089	0.23392
NVP-BEZ235	ATR	7.5598	0.592283
NVP-BEZ235	ATM	13.0899	0.351896
NVP-BEZ235	PRKDC	28.6653	0.190598
NVP-BEZ235	MTOR	30.8929	0.181553
NVP-BEZ235	BCR	103.903	0.110451
NVP-BEZ235	PIK3CA	235.877	0.0900104
NVP-BEZ235	PIK3CD	422.086	0.0731023
NVP-BEZ235	PIK3C2B	440.819	0.0711646
NVP-BEZ235	PIK3C3	662.042	0.0571625
NVP-BEZ235	NUAK1	772.442	0.0531888
NVP-BEZ235	PIK3C2A	1709.15	0.0468601
NVP-BEZ235	MAP4K2	3223.78	0.0429173
NVP-BEZ235	FECH	3606.56	0.0419209
Omipalisib	PIK3CA	0.109754	0.901976
Omipalisib	PIK3CD	0.701345	0.329765
Omipalisib	PRKDC	5.11	0.127643
Omipalisib	ATR	6.53305	0.0978277
PF-04691502	PIK3CG	6.94385	0.263576
Omipalisib	PIK3C2B	10.3719	0.0732813
Omipalisib	MTOR	12.856	0.0675387
Omipalisib	PIK3C2A	13.8441	0.0658095
Omipalisib	PI4KB	14.8728	0.0642439
Omipalisib	PI4KA	15.1483	0.0638596
Omipalisib	ATM	45.1017	0.0508564
Voxtalisib	PIK3CG	14.4339	0.779288
Voxtalisib	PIK3CA	68.7179	0.205975
Voxtalisib	PIK3C2A	72.6158	0.198424
Voxtalisib	PRKDC	228.248	0.0950002
Voxtalisib	CSNK1E	247.973	0.0884639
Voxtalisib	PI4KB	273.762	0.0816467
Voxtalisib	PI4KA	346.308	0.0707223
Voxtalisib	PIK3C2B	396.689	0.0664009
Voxtalisib	CSNK1D	496.573	0.0606631
Voxtalisib	NQO2	518.395	0.0597154
Voxtalisib	PIK3CD	1340.41	0.046029
Voxtalisib	PIP4K2C	1505.59	0.0448589
Voxtalisib	ACAD11	2777.45	0.0417098

## Sheet: S3F_CATDS_ACVR1
Drug	Target	Kdapp (ACVR1) [nM]	CATDSACVR1
Saracatinib	ACVR1	4	0.14
XL-228	ACVR1	5	0.05
Pacritinib	ACVR1	22	0.11
CP466722	ACVR1	33	0.21
Gilteritinib	ACVR1	39	0.05
Sapanisertib	ACVR1	40	0.19
AT-9283	ACVR1	78	0.01
MK-5108	ACVR1	121	0.06
OTS-167	ACVR1	222	0.01
VE-822	ACVR1	227	0.06
TAK-901	ACVR1	249	0.02
Cyc-116	ACVR1	396	0.02
SGI-1776	ACVR1	457	0.1
Milciclib	ACVR1	477	0.02
Danusertib	ACVR1	527	0.01
AEW-541	ACVR1	1202	0.06
RDEA-436	ACVR1	1264	0.09
Fedratinib	ACVR1	1310	0.04
Nintedanib	ACVR1	1415	0.02
Lestaurtinib	ACVR1	1949	0.01
GSK-1070916	ACVR1	3726	0.02
GDC-0994	ACVR1	5859	0.05
AEE-788	ACVR1	16121	0.03

## Sheet: S3G_BindingAffinityComparison
Compound	Target	KBε Kdapp [nM}	Literature affinities		Literature reference
Apitolisib	PIK3CA	8	IC50 [nM]	5	Sutherlin et al., 2011		n.r.	not reported in reference
Apitolisib	PIK3CB	n.i.	IC50 [nM]	27	Sutherlin et al., 2011		n.t.	not tested in recombinant kinase assay
Apitolisib	PIK3CG	102	IC50 [nM]	14	Sutherlin et al., 2011		n.i.	protein was identified as target of the inhibitor
Apitolisib	PIK3CD	133	IC50 [nM]	7	Sutherlin et al., 2011		n.d.	protein was not identified in the Kinobeads assay
Apitolisib	mTOR	278	IC50 [nM]	17	Sutherlin et al., 2011
AZD6738	ATM	0.5		n.i.	Vendetti et al., 2015
AZD6738	PRKDC	0.6		n.i.	Vendetti et al., 2015
AZD6738	ATR	0.8	IC50 [nM]	1	Vendetti et al., 2015
AZD6738	PIK3CA	670		n.i.	Vendetti et al., 2015
AZD6738	PIK3CD	1514	IC50 [nM]	6800	Vendetti et al., 2015
AZD6738	PI4KB	2279		n.t.	Vendetti et al., 2015
BGT226	ATM	0.6		n.r.	Markman et al., 2012
BGT226	MTOR	3		n.r.	Markman et al., 2012
BGT226	ATR	4		n.r.	Markman et al., 2012
BGT226	PIK3CA	8	IC50 [nM]	4	Markman et al., 2012
BGT226	PRKDC	8		n.r.	Markman et al., 2012
BGT226	PIK3CD	23		n.r.	Markman et al., 2012
BGT226	PIK3CB	n.i.	IC50 [nM]	63	Markman et al., 2012
BGT226	PIK3CG	58	IC50 [nM]	38	Markman et al., 2012
BGT226	PI4KA	319		n.r.	Markman et al., 2012
BGT226	PI4KB	676		n.r.	Markman et al., 2012
BGT226	PIK3C3	67		n.r.	Markman et al., 2012
BGT226	PIK3C2B	577		n.r.	Markman et al., 2012
BGT226	PIK3C2A	1068		n.r.	Markman et al., 2012
CH5132799	PIK3CB	6	IC50 [nM]	120	Tanaka et al., 2011
CH5132799	PIK3CA	7	IC50 [nM]	14	Tanaka et al., 2011
CH5132799	PIK3CG	30	IC50 [nM]	36	Tanaka et al., 2011
CH5132799	PIK3CD	85	IC50 [nM]	500	Tanaka et al., 2011
CH5132799	PRKDC	2152		n.t.	Tanaka et al., 2011
CH5132799	MTOR	n.d.	IC50 [nM]	1600	Tanaka et al., 2011
CP466722	ATM	51		n.r.	Guo et al., 2014
CP466722	MTOR	121		n.r.	Guo et al., 2014
CP466722	ATR	238	IC50 [nM]	410	Guo et al., 2014
CP466722	PI4KB	351		n.r.	Guo et al., 2014
CP466722	PIK3C2B	587		n.r.	Guo et al., 2014
Gedatolisib	PIK3C2B	64		n.t.	Venkatesan et al., 2010
Gedatolisib	MTOR	124	IC50 [nM]	1.6	Venkatesan et al., 2010
Gedatolisib	PIK3CA	161	IC50 [nM]	0.4	Venkatesan et al., 2010
Gedatolisib	PRKDC	402		n.t.	Venkatesan et al., 2010
Gedatolisib	PIK3CG	490	IC50 [nM]	5.4	Venkatesan et al., 2010
Gedatolisib	PIK3C2A	601		n.t.	Venkatesan et al., 2010
KU60019	ATM	4	IC50 [nM]	6.3	Golding et al., 2009
KU60019	PRKDC	172	IC50 [nM]	1700	Golding et al., 2009
KU60019	ATR	252	IC50 [nM]	>10000	Golding et al., 2009
NVP-BEZ235	ATR	8	IC50 [nM]	21	Toledo et al., 2009
NVP-BEZ235	ATM	13	IC50 [nM]	7	Toledo et al., 2009
NVP-BEZ235	PRKDC	29	IC50 [nM]	5	Toledo et al., 2009
NVP-BEZ235	MTOR	31	IC50 [nM]	6	Maira et al., 2008
NVP-BEZ235	PIK3CA	236	IC50 [nM]	4	Maira et al., 2008
NVP-BEZ235	PIK3CD	422	IC50 [nM]	7	Maira et al., 2008
NVP-BEZ235	PIK3CB	n.i.	IC50 [nM]	75	Maira et al., 2008
NVP-BEZ235	PIK3CG	n.i.	IC50 [nM]	5	Maira et al., 2008
NVP-BEZ235	PIK3C3	662		n.t.	Maira et al., 2008
NVP-BEZ235	PIK3C2A	1709		n.t.	Maira et al., 2008
Omipalisib	PIK3CA	0.1	Ki [nM]	0.019	Knight et al., 2010
Omipalisib	PIK3CD	0.7	Ki [nM]	0.024	Knight et al., 2010
Omipalisib	PIK3CB	n.i.	Ki [nM]	0.13	Knight et al., 2010
Omipalisib	PRKDC	5	Ki [nM]	0.28	Knight et al., 2010
Omipalisib	ATR	7		n.t.	Knight et al., 2010
Omipalisib	PIK3CG	8	Ki [nM]	0.06	Knight et al., 2010
Omipalisib	PIK3C2B	10		n.t.	Knight et al., 2010
Omipalisib	MTOR	13		n.t.	Knight et al., 2010
Omipalisib	MTORC1	n.d.	Ki [nM]	0.18	Knight et al., 2010
Omipalisib	MTORC2	n.d.	Ki [nM]	0.3	Knight et al., 2010
Omipalisib	PIK3C2A	14		n.t.	Knight et al., 2010
Omipalisib	PI4KB	15		n.t.	Knight et al., 2010
Omipalisib	PI4KA	15		n.t.	Knight et al., 2010
Omipalisib	ATM	45		n.t.	Knight et al., 2010
PF-04691502	PIK3CA	2	Ki [nM]	1.8	Yuan et al., 2011
PF-04691502	PIK3CB	n.d.	Ki [nM]	2.1	Yuan et al., 2011
PF-04691502	PIK3CD	n.i.	Ki [nM]	1.6	Yuan et al., 2011
PF-04691502	PIK3CG	7	Ki [nM]	1.9	Yuan et al., 2011
PF-04691502	PIK3C2B	17		n.t.	Yuan et al., 2011
PF-04691502	PI4KA	65		n.t.	Yuan et al., 2011
PF-04691502	MTOR	265	Ki [nM]	16	Yuan et al., 2011
PF-04691502	PRKDC	1033		n.t.	Yuan et al., 2011
PF-04691502	PI4KB	1201		n.t.	Yuan et al., 2011
PF-04691502	PIK3C2A	4174		n.t.	Yuan et al., 2011
VE-822	ATR	0.7	Ki [nM]	0.2	Fokas et al., 2012
VE-822	ATM	2	Ki [nM]	34	Fokas et al., 2012
VE-822	mTOR	n.i.	Ki [nM]	>1000	Fokas et al., 2012
VE-822	PIK3CG	n.i.	Ki [nM]	220	Fokas et al., 2012
VE-822	PIK3C3	21		n.t.	Fokas et al., 2012
VE-822	PI4KA	59		n.t.	Fokas et al., 2012
VE-822	PI4KB	6890		n.t.	Fokas et al., 2012
Voxtalisib	PIK3CG	14	IC50 [nM]	9	Garcia-Echeverria et al., 2008
Voxtalisib	PIK3CA	69	IC50 [nM]	39	Garcia-Echeverria et al., 2008
Voxtalisib	PIK3CB	n.d.	IC50 [nM]	113	Garcia-Echeverria et al., 2008
Voxtalisib	PIK3C2A	73		n.t.	Garcia-Echeverria et al., 2008
Voxtalisib	PRKDC	228	IC50 [nM]	150	Garcia-Echeverria et al., 2008
Voxtalisib	MTORC1	n.d.	IC50 [nM]	160	Garcia-Echeverria et al., 2008
Voxtalisib	MTORC2	n.d.	IC50 [nM]	190	Garcia-Echeverria et al., 2008
Voxtalisib	PI4KB	274		n.t.	Garcia-Echeverria et al., 2008
Voxtalisib	PI4KA	346		n.t.	Garcia-Echeverria et al., 2008
Voxtalisib	PIK3C2B	397		n.t.	Garcia-Echeverria et al., 2008
Voxtalisib	PIK3CD	1340	IC50 [nM]	43	Garcia-Echeverria et al., 2008
VS5584	PIK3CA	36	IC50 [nM]	16	Hart et al., 2013
VS5584	PIK3CD	251	IC50 [nM]	42	Hart et al., 2013
VS5584	PIK3CG	381	IC50 [nM]	25	Hart et al., 2013
VS5584	MTOR	461	IC50 [nM]	37	Hart et al., 2013
VS5584	PIK3CB	n.d.	IC50 [nM]	68	Hart et al., 2013
